# Supplementary material
Source: PubMed Central journal article supplement (PMC3003014)
Supplement: 1015085107_Appendix.pdf [file 1015085107_Appendix.pdf]

***Supporting Information for:***

***Anabaena* sensory rhodopsin is a light-driven unidirectional rotor**

Angela Strambi<sup>a,b,1,2</sup>, Bo Durbeej<sup>a,1,3</sup>, Nicolas Ferré<sup>c</sup>, Massimo Olivucci<sup>a,b</sup>

<sup>a</sup>Dipartimento di Chimica, Università di Siena, Siena, I-53100, Italy

<sup>b</sup>Chemistry Department, Bowling Green State University, Bowling Green OH 43403, USA

<sup>c</sup>Laboratoire de Chimie Provence, Equipe: Chimie Théorique, Faculté de Saint-Jérôme, Universités Aix-Marseille, Case 521, 13397-Marseille Cedex 20, France

<sup>1</sup>A.S. and B.D. contributed equally to this work

<sup>2</sup>Present address: Istituto Toscano Tumori, Via Fiorentina 1, I-53100 Siena, Italy

<sup>3</sup>Present address: Division of Computational Physics, IFM, Linköping University, SE-581 83 Linköping, Sweden.

**Corresponding author:**

Massimo Olivucci

Dipartimento di Chimica, Università di Siena, Siena, I-53100, Italy

Chemistry Department, Bowling Green State University, Bowling Green OH 43403, USA

E-mail: [olivucci@unisi.it](mailto:olivucci@unisi.it), [molivuc@bgnet.bgsu.edu](mailto:molivuc@bgnet.bgsu.edu)

## SI Computational Methods

**Methodology.** The QM/MM method has been fully described elsewhere (1). Briefly, the method is based on the hydrogen link-atom (HLA) approach (2). The QM part is treated at the CASPT2//CASSCF level of theory, employing the 6-31G(d) basis set and an active space comprising the full  $\pi$ -system (12 electrons in 12  $\pi$ -orbitals) of the protonated Schiff base (PSB) retinal chromophore. The MM part is described by the AMBER96 force field (3). The QM and MM segments interact in the following way: (a) all QM atoms experience the electrostatic potential due to the MM point charges, (b) stretching, bending and torsional potentials involving at least one MM atom are modeled using the corresponding MM potential, and (c) QM and MM atom pairs separated by more than two bonds interact via either standard or reparameterized (4, 5) van der Waals potentials. The CASSCF/AMBER geometry optimizations are carried out by linking the GAUSSIAN 03 (6) and TINKER (7) programs, whereas the CASPT2 single point energy calculations are carried out with the MOLCAS 6.2 program (8).

**The QM/MM Scheme.** The QM/MM scheme is defined by the following Hamiltonian (in atomic units):

$$\hat{H} = \hat{H}_{QM} + \hat{H}_{MM} - \sum_A \sum_i \frac{Q_A}{|\bar{R}_A - \bar{r}_i|} + \sum_A \sum_j \frac{Q_A Z_j}{|\bar{R}_A - \bar{R}_j|} + E_{QM/MM}^{vdW} + E_{QM/MM}^{bonded}$$

where  $\hat{H}_{QM}$  describes the QM segment,  $\hat{H}_{MM}$  the MM segment, and the remaining terms account for interactions between the QM and MM segments. In turn, these terms represent electrostatic interaction between MM point charges and QM electrons, electrostatic interaction between MM point charges and QM nuclei, short-range van der Waals interactions, and additional parameterized potentials required to correctly describe the QM/MM frontier geometry, respectively. Note that the QM wave function is explicitly polarized by the MM point charges. In contrast, the MM point charges remain constant during the QM/MM calculations. On the other hand, the MM point charges include polarization effects in a mean-field way.

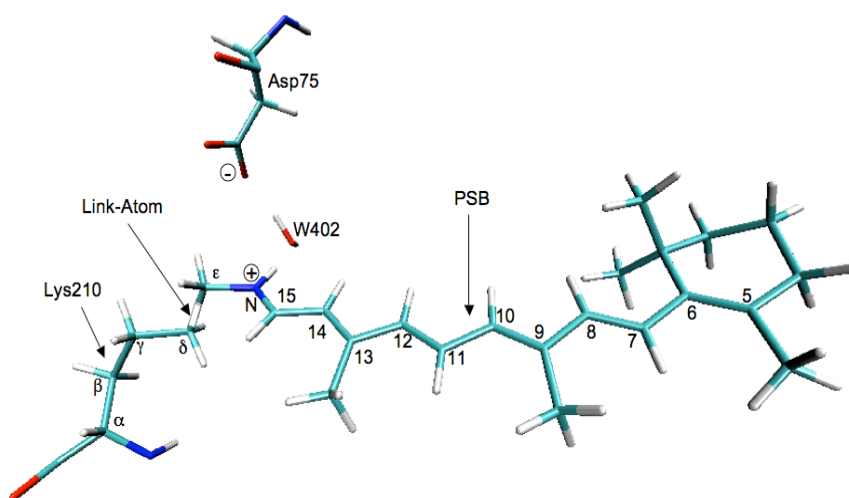

Scheme 1

The QM/MM frontier is placed at the  $C_\epsilon$ - $C_\delta$  bond of the Lys210 side-chain (see Scheme 1 above). This choice ensures that the QM segment (comprising the full retinal chromophore and the last bond of the Lys210

side-chain) is of feasible size and that the QM/MM frontier is well separated from the “reactive”  $\pi$ -backbone. The QM  $C_\epsilon$  atom is capped with a hydrogen atom (the HLA approach), to restore full valence. The link atom is throughout all calculations held fixed along the  $C_\epsilon$ - $C_\delta$  axis, at 1 Å distance from  $C_\epsilon$ .

A number of AMBER96 MM parameters for atoms close to the QM/MM frontier have been modified, as further detailed in previous studies (1, 4, 5). First, the charges assigned to Lys210 (totaling +1) have been reparameterized, since our QM/MM scheme requires the MM part of Lys210 to have a net charge of zero (the positive charge of Lys210 is included in the QM system). Furthermore, the charge of the  $C_\delta$  atom is set to zero, to ensure that the QM wave function is not over-polarized by the HLA. This procedure is motivated by the small value of the default AMBER96 charge for this atom, and makes it possible to use standard MM bonded potentials for the description of the QM/MM frontier geometry. Second, van der Waals parameters for retinal and the  $C_{15}$ -N- $C_\epsilon$ - $C_\delta$  torsion potential, which are not included in AMBER96, have been determined in such a way that the CASSCF N- $C_\epsilon$ - $C_\delta$ - $C_\gamma$  and  $C_{15}$ -N- $C_\epsilon$ - $C_\delta$  torsional energy profiles (both  $S_0$  and  $S_1$ ) of the model system shown in Scheme 2 below is best reproduced by the QM/MM calculations.

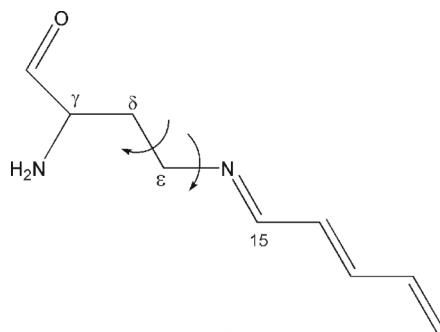

Scheme 2

**The protein models.** The models of ASR<sub>AT</sub> and ASR<sub>13C</sub> were built starting from the 2.0 Å resolution X-ray crystal structure reported by Vogeley et al., with PDB entry 1XIO (9). All amino acid residues were included, but neither solvent nor lipidic molecules used in the crystallization process were retained. The crystal structure includes two forms of the retinal chromophore; coordinates for both 13-*cis* (set A) and all-*trans* (set B) retinal are provided. Moreover, a specific set of Lys210 coordinates is provided for both chromophore forms. Thus, the model of ASR<sub>13C</sub> includes 13-*cis* retinal and Lys210-setA, whereas the model of ASR<sub>AT</sub> includes all-*trans* retinal and Lys210-setB. For all other residues the crystal structure reports only one set of coordinates. The only charged residue of the chromophore binding domain is the anionic aspartate residue (Asp75) that acts as a counterion to retinal. In order to obtain an overall uncharged QM+MM system, the protonation states of residues His21, Lys96, Lys167 and His219 were set to neutral. Finally, the protein models also include a water molecule (W402), located between retinal and Asp75, which was modeled using the TIP3P method (10).

## References

1. Ferré N, Olivucci M (2003) Probing the rhodopsin cavity with reduced retinal models at the CASPT2//CASSCF/AMBER level of theory. *J. Am. Chem. Soc.* 125:6868-6869.
2. Singh UC, Kollman PA (1986) A combined ab initio quantum mechanical and molecular mechanical method for carrying out simulations on complex molecular systems: applications to the  $\text{CH}_3\text{Cl} + \text{Cl}^-$  exchange reaction and gas phase protonation of polyethers. *J. Comput. Chem.* 7:718-730.
3. Cornell WD, Cieplak P, Bayly CI, Gould IR, Merz KM, Ferguson DM, Spellmeyer DC, Fox T,

- Caldwell JW, Kollman PA (1985) A second generation force field for the simulation of proteins, nucleic acids, and organic molecules. *J. Am. Chem. Soc.* 117:5179-5197.
4. Ferré N, Olivucci M (2003) The amide bond: pitfalls and drawbacks of the link atom scheme. *J. Mol. Struct. (Theochem)* 632:71-82.
  5. Ferré N, Cembran A, Garavelli M, Olivucci M (2004) Complete-active-space self-consistent-field/Amber parameterization of the Lys296-retinal-Glu113 rhodopsin chromophore-counterion system. *Theor. Chem. Acc.* 112:335-341.
  6. Frisch MJ, et al. (2004) GAUSSIAN 03, Revision D.02, Gaussian, Inc., Wallingford CT.
  7. Ponder JW, Richards FM (1987) An efficient Newton-like method for molecular mechanics energy minimization of large molecules. *J. Comput. Chem.* 8:1016-1024.
  8. Andersson K, et al. (2004) MOLCAS, Version 6.2, Lund University, Lund, Sweden.
  9. Vogeley L, et al. (2004) Anabaena sensory rhodopsin: a photochromic color sensor at 2.0 Å. *Science* 306:1390-1393.
  10. Jorgensen WL, Chandrasekhar J, Madura JD, Impey RW, Klein ML (1983) Comparison of simple potential functions for simulating liquid water. *J. Chem. Phys.* 79:926-935.

**Table S1. QM/MM energies ( $E_{\text{QM/MM}}$ , in a.u.), oscillator strengths (f), and dipole moments ( $\mu$ , in Debye) of different states of computed molecular structures**

| Structure              | State          | $E_{\text{QM/MM}}$  |                     | f     | $\mu^c$ |
|------------------------|----------------|---------------------|---------------------|-------|---------|
|                        |                | CASPT2 <sup>a</sup> | CASSCF <sup>b</sup> |       |         |
| ASR <sub>AT</sub>      | S <sub>0</sub> | -871.315886 (0.557) | -868.611579         |       | 29.5    |
|                        | S <sub>1</sub> | -871.234717 (0.549) | -868.492563         | 1.29  | 15.3    |
|                        | S <sub>2</sub> | -871.196438 (0.550) | -868.460953         | 0.42  | 23.8    |
| ASR <sub>AT</sub> -CI  | S <sub>0</sub> | -871.243612 (0.553) | -868.532199         |       | 31.8    |
|                        | S <sub>1</sub> | -871.260840 (0.550) | -868.517812         | 0.09  | 12.3    |
|                        | S <sub>2</sub> | -871.179816 (0.542) | -868.454822         | 0.01  | 33.5    |
| ASR <sub>AT</sub> -K   | S <sub>0</sub> | -871.270362 (0.556) | -868.562245         |       | 28.0    |
|                        | S <sub>1</sub> | -871.190724 (0.549) | -868.449540         | 1.18  | 13.7    |
|                        | S <sub>2</sub> | -871.151389 (0.548) | -868.410935         | 0.23  | 22.4    |
| ASR <sub>AT</sub> -L   | S <sub>0</sub> | -871.317898 (0.557) | -868.614171         |       | 29.7    |
|                        | S <sub>1</sub> | -871.234479 (0.549) | -868.491005         | 1.11  | 15.4    |
|                        | S <sub>2</sub> | -871.194118 (0.549) | -868.459061         | 0.29  | 25.6    |
| ASR <sub>13C</sub>     | S <sub>0</sub> | -871.320286 (0.557) | -868.618306         |       | 19.5    |
|                        | S <sub>1</sub> | -871.235341 (0.548) | -868.490899         | 1.05  | 35.3    |
|                        | S <sub>2</sub> | -871.194602 (0.549) | -868.460393         | 0.30  | 22.9    |
| ASR <sub>13C</sub> -CI | S <sub>0</sub> | -871.248880 (0.554) | -868.542687         |       | 17.00   |
|                        | S <sub>1</sub> | -871.266968 (0.550) | -868.524325         | 0.03  | 37.3    |
|                        | S <sub>2</sub> | -871.184867 (0.548) | -868.466460         | <0.00 | 16.5    |
| ASR <sub>13C</sub> -K  | S <sub>0</sub> | -871.285944 (0.556) | -868.582218         |       | 20.7    |
|                        | S <sub>1</sub> | -871.205669 (0.548) | -868.459669         | 1.10  | 34.7    |
|                        | S <sub>2</sub> | -871.164260 (0.548) | -868.427788         | 0.31  | 24.2    |
| ASR <sub>13C</sub> -L  | S <sub>0</sub> | -871.320816 (0.557) | -868.620053         |       | 19.2    |
|                        | S <sub>1</sub> | -871.237541 (0.549) | -868.494543         | 1.17  | 35.1    |

|                           |                |                     |             |      |      |
|---------------------------|----------------|---------------------|-------------|------|------|
|                           | S <sub>2</sub> | -871.197913 (0.549) | -868.463985 | 0.43 | 24.5 |
| ASR <sub>AT</sub> -(-161) | S <sub>0</sub> | -871.304296 (0.553) | -868.581666 |      | 23.5 |
|                           | S <sub>1</sub> | -871.249935 (0.550) | -868.515559 | 1.30 | 15.6 |
|                           | S <sub>2</sub> | -871.220704 (0.548) | -868.483898 | 0.58 | 25.2 |
| ASR <sub>AT</sub> -(-140) | S <sub>0</sub> | -871.298160 (0.553) | -868.573336 |      | 22.5 |
|                           | S <sub>1</sub> | -871.245823 (0.550) | -868.510660 | 1.27 | 16.2 |
|                           | S <sub>2</sub> | -871.212987 (0.547) | -868.475189 | 0.52 | 25.5 |
| ASR <sub>AT</sub> -(-125) | S <sub>0</sub> | -871.282503 (0.552) | -868.555613 |      | 23.2 |
|                           | S <sub>1</sub> | -871.249295 (0.549) | -868.512895 | 0.84 | 17.9 |
|                           | S <sub>2</sub> | -871.197932 (0.547) | -868.464473 | 0.32 | 28.7 |
| ASR <sub>AT</sub> -(-110) | S <sub>0</sub> | -871.248661 (0.553) | -868.534581 |      | 31.4 |
|                           | S <sub>1</sub> | -871.259582 (0.549) | -868.515912 | 0.14 | 12.7 |
|                           | S <sub>2</sub> | -871.178620 (0.548) | -868.457161 | 0.01 | 33.8 |
| ASR <sub>13C</sub> -(21)  | S <sub>0</sub> | -871.308126 (0.553) | -868.586465 |      | 24.6 |
|                           | S <sub>1</sub> | -871.252243 (0.549) | -868.518045 | 1.21 | 32.8 |
|                           | S <sub>2</sub> | -871.222645 (0.547) | -868.486350 | 0.50 | 23.5 |
| ASR <sub>13C</sub> -(30)  | S <sub>0</sub> | -871.306761 (0.553) | -868.583735 |      | 25.0 |
|                           | S <sub>1</sub> | -871.254432 (0.549) | -868.520283 | 1.16 | 32.1 |
|                           | S <sub>2</sub> | -871.221173 (0.547) | -868.484673 | 0.50 | 23.4 |
| ASR <sub>13C</sub> -(40)  | S <sub>0</sub> | -871.302842 (0.552) | -868.578926 |      | 25.1 |
|                           | S <sub>1</sub> | -871.254982 (0.549) | -868.520979 | 1.07 | 31.1 |
|                           | S <sub>2</sub> | -871.217094 (0.547) | -868.481319 | 0.48 | 22.8 |
| ASR <sub>13C</sub> -(50)  | S <sub>0</sub> | -871.300591 (0.552) | -868.575875 |      | 25.1 |
|                           | S <sub>1</sub> | -871.255915 (0.549) | -868.521284 | 1.01 | 30.8 |
|                           | S <sub>2</sub> | -871.214900 (0.547) | -868.479634 | 0.44 | 22.2 |
| ASR <sub>13C</sub> -(60)  | S <sub>0</sub> | -871.286991 (0.552) | -868.562238 |      | 23.9 |
|                           | S <sub>1</sub> | -871.260275 (0.549) | -868.523478 | 0.69 | 30.9 |
|                           | S <sub>2</sub> | -871.202668 (0.546) | -868.473150 | 0.22 | 19.4 |

|                          |                |                     |             |      |      |
|--------------------------|----------------|---------------------|-------------|------|------|
| ASR <sub>13C</sub> -(70) | S <sub>0</sub> | -871.282818 (0.552) | -868.558731 |      | 23.3 |
|                          | S <sub>1</sub> | -871.262033 (0.549) | -868.524016 | 0.58 | 31.5 |
|                          | S <sub>2</sub> | -871.200521 (0.545) | -868.472099 | 0.15 | 18.6 |

---

<sup>a</sup> CASPT2(12,12)/6-31G(d) calculations with a real level shift of 0.2, reference weights in parentheses

<sup>b</sup> CASSCF(12,12)/6-31G(d) three-root state-average calculations with equal weights (1/3) for S<sub>0</sub>, S<sub>1</sub> and S<sub>2</sub>

<sup>c</sup> Obtained using CASSCF wavefunctions and standard Mulliken population analysis

**Table S2. CASSCF/AMBER vibrational frequencies (in  $\text{cm}^{-1}$ ) for Schiff base N-D stretching in different states of ASR<sup>a</sup>**

| State                 | Scheme A <sup>b</sup> | Scheme B <sup>c</sup> | Exp <sup>d</sup> |
|-----------------------|-----------------------|-----------------------|------------------|
| ASR <sub>AT</sub>     | 2654                  | 2609                  | 2163, 2125       |
| ASR <sub>AT</sub> -K  | 2754                  | 2720                  | 2483             |
| ASR <sub>AT</sub> -L  | 2692                  | 2622                  |                  |
| ASR <sub>13C</sub>    | 2702                  | 2632                  | 2165             |
| ASR <sub>13C</sub> -K | 2751                  | 2689                  | 2351             |
| ASR <sub>13C</sub> -L | 2655                  | 2605                  |                  |

<sup>a</sup> Note that no empiric scaling parameters have been used in the calculations to, as often done, improve the agreement with the experimental data

<sup>b</sup> Obtained by fitting CASSCF/AMBER energies of structures distorted from equilibrium (with respect to the N-H bond length) to a second-order polynomial, using CASSCF(12,12)/6-31G(d) for the QM system

<sup>c</sup> Obtained by performing numerical CASSCF/AMBER frequency calculations, using CASSCF(8,8)/3-21G(d) for the QM system

<sup>d</sup> Experimental data from (24)



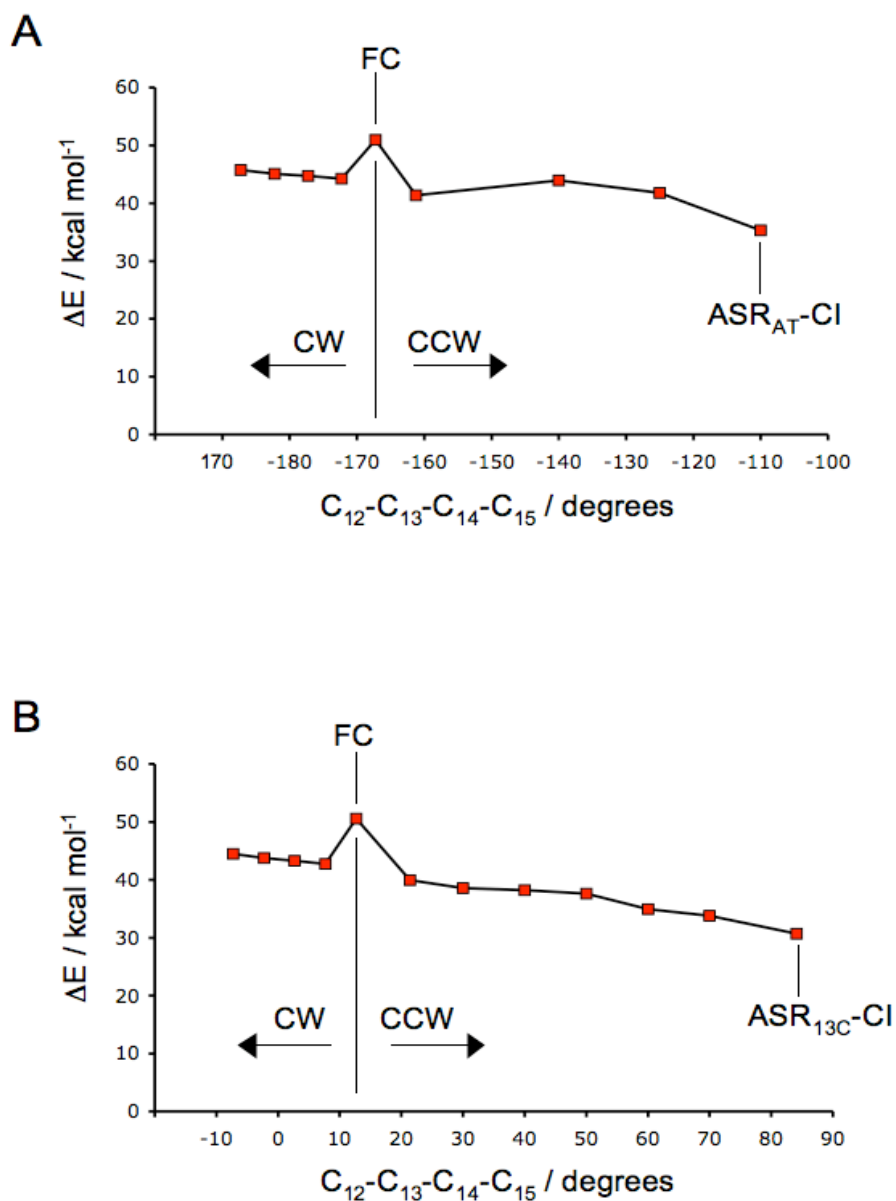

**Fig. S1** (A) CASPT2//CASSCF/AMBER  $S_1$  energy profile for CCW and limited CW  $C_{13}=C_{14}$  torsional motion starting from the Franck-Condon (FC) point of  $ASR_{AT}$ . (B) The corresponding energy profile for  $ASR_{13C}$ . Notably, for both  $ASR_{AT}$  and  $ASR_{13C}$ , the CW motion is energetically less favorable.

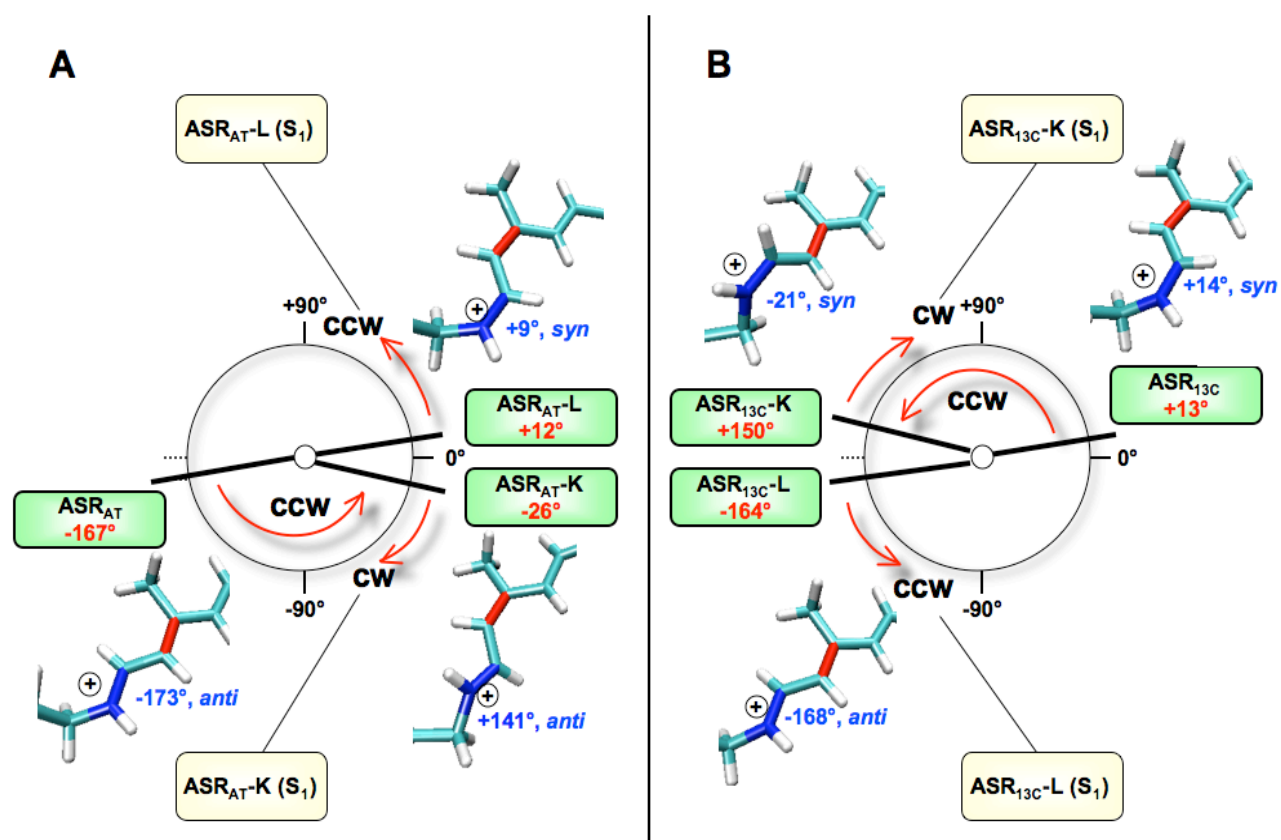

**Fig. S2** (A) C13=C14 Newman projections highlighting the influence of C15=N geometry (*syn* or *anti*) on the direction (CCW or CW) of C13=C14 photoisomerization in the parent, K and L states of ASR<sub>AT</sub>. Isomerization directions are determined by excited state geometry optimizations and are indicated by red curly arrows. Structural data are also reported: C15=N dihedrals in blue font and C13=C14 dihedrals in red font. Notably, photoisomerization in the K state (C15=N *anti* with M helicity) would occur in a direction opposite (i.e., CW) to that in the parent state, whereas photoisomerization in the L state (C15=N *syn* with P helicity) would occur in the same direction (i.e., CCW). (B) The corresponding data for ASR<sub>13C</sub>. Notably, photoisomerization in the K state (C15=N *syn* with M helicity) would occur in a direction opposite (i.e., CW) to that in the parent state, whereas photoisomerization in the L state (C15=N *anti* with P helicity) would occur in the same direction (i.e., CCW). Taken together, this data (panels A and B) show that the thermal K→L transition is required for the molecular rotor function of ASR.

## SI Molecular Structures

Cartesian coordinates (in Å) of computed molecular structures obtained at the CASSCF(12,12)/6-31G(d)/AMBER level of theory, together with AMBER charges of the MM atoms. Atoms in bold font have been kept frozen in the calculations. Atom HLA denotes the hydrogen link atom.

### ASR<sub>AT</sub>

| Atom     | x         | y         | z         | charge  |
|----------|-----------|-----------|-----------|---------|
| <b>N</b> | 2.593000  | 5.425000  | 10.766000 | -.51630 |
| <b>C</b> | 1.598000  | 4.397000  | 11.015000 | .03810  |
| <b>C</b> | 1.894000  | 3.247000  | 10.041000 | .53660  |
| <b>O</b> | 2.171000  | 2.124000  | 10.461000 | -.58190 |
| <b>H</b> | 2.294660  | 6.326150  | 10.418160 | .29360  |
| <b>H</b> | 1.652250  | 4.029300  | 12.031930 | .08800  |
| <b>C</b> | 0.200000  | 4.985000  | 10.779000 | -.03030 |
| <b>C</b> | -0.894000 | 3.935000  | 10.722000 | .79940  |
| <b>O</b> | -0.622000 | 2.724000  | 10.890000 | -.80140 |
| <b>O</b> | -2.054000 | 4.344000  | 10.493000 | -.80140 |
| <b>H</b> | 0.168790  | 5.536590  | 9.849410  | -.01220 |
| <b>H</b> | -0.022330 | 5.685980  | 11.579840 | -.01220 |
| <b>N</b> | -7.314000 | -2.087000 | 8.008000  | -.39805 |
| <b>C</b> | -6.874000 | -2.459000 | 9.345000  | -.24000 |
| <b>C</b> | -7.932000 | -3.320000 | 10.048000 | .68395  |
| <b>O</b> | -7.826000 | -4.547000 | 10.085000 | -.63955 |
| H        | -7.775051 | -1.194053 | 7.880010  | .22455  |
| H        | -5.999425 | -3.108739 | 9.267852  | .14260  |
| C        | -6.505648 | -1.248707 | 10.244308 | -.00940 |
| C        | -5.086848 | -0.692040 | 10.079462 | .01870  |
| C        | -4.904893 | 0.329141  | 8.963841  | .00000  |
| C        | -3.438499 | 0.776910  | 8.996314  |         |
| N        | -3.072447 | 1.460917  | 7.756612  |         |
| H        | -6.551699 | -1.593702 | 11.279825 | .03620  |
| H        | -7.241183 | -0.450359 | 10.154021 | .03620  |
| H        | -4.403551 | -1.521131 | 9.901933  | .01030  |
| H        | -4.807042 | -0.208359 | 11.017243 | .01030  |
| H        | -5.556087 | 1.188550  | 9.127664  | .06210  |
| H        | -5.145156 | -0.144018 | 8.009407  | .06210  |
| H        | -2.792494 | -0.080227 | 9.110551  |         |
| H        | -3.267867 | 1.445995  | 9.824446  |         |
| H        | -3.041752 | 2.474565  | 7.776553  |         |
| C        | 2.540743  | 5.211347  | -1.831143 |         |
| C        | 3.172906  | 6.214507  | -2.820007 |         |
| C        | 4.396674  | 5.663855  | -3.535128 |         |
| C        | 3.974632  | 4.477798  | -4.383851 |         |
| C        | 3.076545  | 3.509052  | -3.646378 |         |
| C        | 2.441859  | 3.809400  | -2.479220 |         |

|     |           |           |           |         |
|-----|-----------|-----------|-----------|---------|
| C   | 1.668216  | 2.737042  | -1.821504 |         |
| C   | 1.181298  | 2.710416  | -0.564673 |         |
| C   | 0.448208  | 1.611647  | 0.057930  |         |
| C   | 0.012059  | 1.857067  | 1.320043  |         |
| C   | -0.779254 | 1.012576  | 2.175397  |         |
| C   | -1.205887 | 1.488720  | 3.368851  |         |
| C   | -1.967674 | 0.753581  | 4.351076  |         |
| C   | -2.267164 | 1.426585  | 5.500918  |         |
| C   | -2.771359 | 0.818807  | 6.678633  |         |
| C   | 3.409569  | 5.173525  | -0.554989 |         |
| C   | 1.148419  | 5.788837  | -1.493606 |         |
| C   | 2.984677  | 2.169323  | -4.352137 |         |
| C   | 0.176650  | 0.335307  | -0.701244 |         |
| C   | -2.372342 | -0.668090 | 4.046421  |         |
| H   | 3.455950  | 4.830620  | -5.272887 |         |
| H   | 4.845362  | 3.946254  | -4.758195 |         |
| H   | 4.838325  | 6.430614  | -4.162578 |         |
| H   | 5.160511  | 5.364288  | -2.823124 |         |
| H   | 3.406682  | 7.130384  | -2.286606 |         |
| H   | 2.432263  | 6.482334  | -3.570201 |         |
| H   | 0.667374  | 5.316719  | -0.647950 |         |
| H   | 1.246531  | 6.845388  | -1.268012 |         |
| H   | 0.477142  | 5.703956  | -2.341005 |         |
| H   | 3.013902  | 4.527475  | 0.216128  |         |
| H   | 4.415286  | 4.827638  | -0.766272 |         |
| H   | 3.476443  | 6.173574  | -0.132761 |         |
| H   | 2.059392  | 1.632551  | -4.195274 |         |
| H   | 3.077874  | 2.331779  | -5.421188 |         |
| H   | 3.802800  | 1.511742  | -4.061516 |         |
| H   | 1.507950  | 1.854730  | -2.405220 |         |
| H   | 1.319607  | 3.550900  | 0.079520  |         |
| H   | 0.248796  | 2.818062  | 1.744940  |         |
| H   | -1.033048 | 0.020474  | 1.856717  |         |
| H   | -0.927173 | 2.492064  | 3.641655  |         |
| H   | -1.985561 | 2.460894  | 5.578029  |         |
| H   | -0.175813 | -0.455231 | -0.052850 |         |
| H   | -0.572485 | 0.487433  | -1.472446 |         |
| H   | 1.076946  | -0.020500 | -1.189175 |         |
| H   | -2.884018 | -1.160444 | 4.862138  |         |
| H   | -3.037940 | -0.668560 | 3.191425  |         |
| H   | -1.508576 | -1.265095 | 3.782721  |         |
| H   | -2.872215 | -0.248472 | 6.735849  |         |
| O   | -3.319321 | 4.290919  | 8.208171  | -.83400 |
| H   | -3.920111 | 5.034593  | 8.374465  | .41700  |
| H   | -2.794977 | 4.341844  | 9.055608  | .41700  |
| HLA | -4.394685 | 0.484917  | 8.975142  |         |

**ASR<sub>AT</sub>-CI**

| Atom     | x         | y         | z         | charge  |
|----------|-----------|-----------|-----------|---------|
| <b>N</b> | 2.593000  | 5.425000  | 10.766000 | -.51630 |
| <b>C</b> | 1.598000  | 4.397000  | 11.015000 | .03810  |
| <b>C</b> | 1.894000  | 3.247000  | 10.041000 | .53660  |
| <b>O</b> | 2.171000  | 2.124000  | 10.461000 | -.58190 |
| <b>H</b> | 2.294660  | 6.326150  | 10.418160 | .29360  |
| <b>H</b> | 1.652250  | 4.029300  | 12.031930 | .08800  |
| <b>C</b> | 0.200000  | 4.985000  | 10.779000 | -.03030 |
| <b>C</b> | -0.894000 | 3.935000  | 10.722000 | .79940  |
| <b>O</b> | -0.622000 | 2.724000  | 10.890000 | -.80140 |
| <b>O</b> | -2.054000 | 4.344000  | 10.493000 | -.80140 |
| <b>H</b> | 0.168790  | 5.536590  | 9.849410  | -.01220 |
| <b>H</b> | -0.022330 | 5.685980  | 11.579840 | -.01220 |
| <b>N</b> | -7.314000 | -2.087000 | 8.008000  | -.39805 |
| <b>C</b> | -6.874000 | -2.459000 | 9.345000  | -.24000 |
| <b>C</b> | -7.932000 | -3.320000 | 10.048000 | .68395  |
| <b>O</b> | -7.826000 | -4.547000 | 10.085000 | -.63955 |
| H        | -7.780978 | -1.197009 | 7.881732  | .22455  |
| H        | -6.002977 | -3.113063 | 9.263052  | .14260  |
| C        | -6.482521 | -1.252505 | 10.246469 | -.00940 |
| C        | -5.060627 | -0.682256 | 10.084406 | .01870  |
| C        | -4.906580 | 0.372979  | 8.994624  | .00000  |
| C        | -3.461379 | 0.907385  | 8.942929  |         |
| N        | -3.204123 | 1.462535  | 7.616318  |         |
| H        | -6.521305 | -1.606944 | 11.278811 | .03620  |
| H        | -7.220591 | -0.454155 | 10.171461 | .03620  |
| H        | -4.370824 | -1.497829 | 9.873363  | .01030  |
| H        | -4.772769 | -0.218423 | 11.029996 | .01030  |
| H        | -5.588927 | 1.202526  | 9.189623  | .06210  |
| H        | -5.172012 | -0.089431 | 8.041768  | .06210  |
| H        | -2.759772 | 0.104109  | 9.125506  |         |
| H        | -3.322344 | 1.673462  | 9.696607  |         |
| H        | -3.642810 | 2.364152  | 7.424476  |         |
| C        | 2.411036  | 5.256052  | -1.707421 |         |
| C        | 2.934851  | 6.297242  | -2.722368 |         |
| C        | 4.211284  | 5.851073  | -3.419136 |         |
| C        | 3.901002  | 4.617382  | -4.250288 |         |
| C        | 3.064287  | 3.594182  | -3.515183 |         |
| C        | 2.406613  | 3.847345  | -2.343127 |         |
| C        | 1.700028  | 2.725086  | -1.708931 |         |
| C        | 1.289386  | 2.587932  | -0.406530 |         |
| C        | 0.629863  | 1.459642  | 0.166834  |         |
| C        | 0.203556  | 1.596560  | 1.508577  |         |
| C        | -0.550294 | 0.704892  | 2.241124  |         |
| C        | -1.091022 | 1.079488  | 3.520108  |         |
| C        | -2.083325 | 0.423514  | 4.175122  |         |

|     |           |           |           |         |
|-----|-----------|-----------|-----------|---------|
| C   | -2.744717 | 1.123056  | 5.294141  |         |
| C   | -2.576487 | 0.816061  | 6.657198  |         |
| C   | 3.304727  | 5.303895  | -0.450206 |         |
| C   | 0.983278  | 5.701879  | -1.335485 |         |
| C   | 3.041013  | 2.244209  | -4.206431 |         |
| C   | 0.316430  | 0.217847  | -0.626081 |         |
| C   | -2.681034 | -0.865968 | 3.656861  |         |
| H   | 3.372158  | 4.909446  | -5.155871 |         |
| H   | 4.817444  | 4.148555  | -4.598386 |         |
| H   | 4.595657  | 6.642164  | -4.054302 |         |
| H   | 4.990710  | 5.628062  | -2.696499 |         |
| H   | 3.070403  | 7.245927  | -2.214810 |         |
| H   | 2.173022  | 6.465030  | -3.480461 |         |
| H   | 0.571024  | 5.155756  | -0.496747 |         |
| H   | 0.992204  | 6.755310  | -1.079162 |         |
| H   | 0.306438  | 5.575808  | -2.173465 |         |
| H   | 2.913802  | 4.710641  | 0.365692  |         |
| H   | 4.304951  | 4.939278  | -0.654468 |         |
| H   | 3.379553  | 6.328266  | -0.095572 |         |
| H   | 2.043405  | 1.830333  | -4.299187 |         |
| H   | 3.438521  | 2.344500  | -5.208373 |         |
| H   | 3.655174  | 1.512563  | -3.688286 |         |
| H   | 1.521495  | 1.887628  | -2.344922 |         |
| H   | 1.456621  | 3.390630  | 0.276799  |         |
| H   | 0.455027  | 2.523852  | 1.990827  |         |
| H   | -0.822096 | -0.235949 | 1.819014  |         |
| H   | -0.756413 | 2.027031  | 3.903492  |         |
| H   | -3.514427 | 1.844869  | 5.028839  |         |
| H   | 0.351524  | -0.664208 | 0.000195  |         |
| H   | -0.675532 | 0.277116  | -1.063166 |         |
| H   | 1.018835  | 0.074811  | -1.434837 |         |
| H   | -3.398327 | -1.291567 | 4.346181  |         |
| H   | -3.173110 | -0.710337 | 2.701732  |         |
| H   | -1.912094 | -1.616282 | 3.496928  |         |
| H   | -1.980133 | -0.031116 | 6.965805  |         |
| O   | -3.392940 | 4.343830  | 8.179262  | -.83400 |
| H   | -3.893618 | 5.157027  | 8.351952  | .41700  |
| H   | -2.848939 | 4.325791  | 9.012455  | .41700  |
| HLA | -4.398775 | 0.560738  | 8.976467  |         |

**ASR<sub>AT</sub>-K**

| Atom     | x         | y         | z         | charge  |
|----------|-----------|-----------|-----------|---------|
| <b>N</b> | 2.593000  | 5.425000  | 10.766000 | -.51630 |
| <b>C</b> | 1.598000  | 4.397000  | 11.015000 | .03810  |
| <b>C</b> | 1.894000  | 3.247000  | 10.041000 | .53660  |
| <b>O</b> | 2.171000  | 2.124000  | 10.461000 | -.58190 |
| <b>H</b> | 2.294660  | 6.326150  | 10.418160 | .29360  |
| <b>H</b> | 1.652250  | 4.029300  | 12.031930 | .08800  |
| <b>C</b> | 0.200000  | 4.985000  | 10.779000 | -.03030 |
| <b>C</b> | -0.894000 | 3.935000  | 10.722000 | .79940  |
| <b>O</b> | -0.622000 | 2.724000  | 10.890000 | -.80140 |
| <b>O</b> | -2.054000 | 4.344000  | 10.493000 | -.80140 |
| <b>H</b> | 0.168790  | 5.536590  | 9.849410  | -.01220 |
| <b>H</b> | -0.022330 | 5.685980  | 11.579840 | -.01220 |
| <b>N</b> | -7.314000 | -2.087000 | 8.008000  | -.39805 |
| <b>C</b> | -6.874000 | -2.459000 | 9.345000  | -.24000 |
| <b>C</b> | -7.932000 | -3.320000 | 10.048000 | .68395  |
| <b>O</b> | -7.826000 | -4.547000 | 10.085000 | -.63955 |
| H        | -7.779231 | -1.196158 | 7.882159  | .22455  |
| H        | -6.008673 | -3.120059 | 9.257130  | .14260  |
| C        | -6.452698 | -1.263089 | 10.253543 | -.00940 |
| C        | -5.037499 | -0.662139 | 10.071104 | .01870  |
| C        | -4.989395 | 0.449886  | 9.026292  | .00000  |
| C        | -3.609289 | 1.108171  | 8.780917  |         |
| N        | -3.462444 | 1.240582  | 7.321395  |         |
| H        | -6.467379 | -1.635748 | 11.279913 | .03620  |
| H        | -7.201705 | -0.472249 | 10.211346 | .03620  |
| H        | -4.339488 | -1.452138 | 9.795945  | .01030  |
| H        | -4.722127 | -0.230891 | 11.022924 | .01030  |
| H        | -5.685936 | 1.232675  | 9.325086  | .06210  |
| H        | -5.359014 | 0.001878  | 8.099541  | .06210  |
| H        | -2.815931 | 0.477646  | 9.153705  |         |
| H        | -3.564757 | 2.075945  | 9.262840  |         |
| H        | -4.333808 | 1.359720  | 6.839805  |         |
| C        | 2.380712  | 5.245430  | -1.655581 |         |
| C        | 2.875165  | 6.249842  | -2.718545 |         |
| C        | 4.151917  | 5.792314  | -3.409032 |         |
| C        | 3.857341  | 4.517532  | -4.182579 |         |
| C        | 3.016282  | 3.524191  | -3.410610 |         |
| C        | 2.369833  | 3.819876  | -2.252663 |         |
| C        | 1.614315  | 2.728660  | -1.583546 |         |
| C        | 1.445710  | 2.527584  | -0.259658 |         |
| C        | 0.650791  | 1.454321  | 0.343957  |         |
| C        | 0.330413  | 1.587995  | 1.662594  |         |
| C        | -0.604693 | 0.741165  | 2.357128  |         |
| C        | -1.122056 | 0.964979  | 3.593992  |         |
| C        | -2.233130 | 0.165528  | 4.072680  |         |

|     |           |           |           |         |
|-----|-----------|-----------|-----------|---------|
| C   | -2.883750 | 0.329583  | 5.258403  |         |
| C   | -2.500558 | 0.873238  | 6.538727  |         |
| C   | 3.301100  | 5.342381  | -0.418341 |         |
| C   | 0.960779  | 5.692545  | -1.259485 |         |
| C   | 2.987337  | 2.150461  | -4.058370 |         |
| C   | 0.179919  | 0.303323  | -0.525476 |         |
| C   | -2.800400 | -0.904455 | 3.171805  |         |
| H   | 3.342133  | 4.760708  | -5.109914 |         |
| H   | 4.778758  | 4.033367  | -4.493380 |         |
| H   | 4.520050  | 6.559096  | -4.082540 |         |
| H   | 4.942146  | 5.618584  | -2.684220 |         |
| H   | 3.000750  | 7.222040  | -2.255503 |         |
| H   | 2.101363  | 6.373929  | -3.472948 |         |
| H   | 0.552832  | 5.125887  | -0.430934 |         |
| H   | 0.981070  | 6.739756  | -0.973466 |         |
| H   | 0.274867  | 5.600034  | -2.095737 |         |
| H   | 2.880465  | 4.863644  | 0.456327  |         |
| H   | 4.273127  | 4.894844  | -0.597370 |         |
| H   | 3.449590  | 6.387592  | -0.158096 |         |
| H   | 1.988176  | 1.739494  | -4.154019 |         |
| H   | 3.402172  | 2.213521  | -5.058050 |         |
| H   | 3.586317  | 1.428000  | -3.511011 |         |
| H   | 1.166956  | 2.005877  | -2.239491 |         |
| H   | 1.876259  | 3.209460  | 0.444338  |         |
| H   | 0.698680  | 2.443751  | 2.202461  |         |
| H   | -0.971869 | -0.100041 | 1.809617  |         |
| H   | -0.782816 | 1.795899  | 4.189941  |         |
| H   | -3.833848 | -0.166462 | 5.342597  |         |
| H   | -0.031997 | -0.588751 | 0.050059  |         |
| H   | -0.714843 | 0.555952  | -1.089249 |         |
| H   | 0.946294  | 0.040935  | -1.244755 |         |
| H   | -3.692384 | -1.341519 | 3.601416  |         |
| H   | -3.049412 | -0.539923 | 2.184810  |         |
| H   | -2.069122 | -1.694249 | 3.055307  |         |
| H   | -1.505958 | 0.818599  | 6.946861  |         |
| O   | -3.382647 | 4.490300  | 8.182292  | -.83400 |
| H   | -3.898940 | 5.280573  | 8.396371  | .41700  |
| H   | -2.846470 | 4.411432  | 9.011230  | .41700  |
| HLA | -4.500463 | 0.683082  | 8.939374  |         |



**ASR<sub>AT</sub>-L**

| Atom     | x         | y         | z         | charge  |
|----------|-----------|-----------|-----------|---------|
| <b>N</b> | 2.593000  | 5.425000  | 10.766000 | -.51630 |
| <b>C</b> | 1.598000  | 4.397000  | 11.015000 | .03810  |
| <b>C</b> | 1.894000  | 3.247000  | 10.041000 | .53660  |
| <b>O</b> | 2.171000  | 2.124000  | 10.461000 | -.58190 |
| <b>H</b> | 2.294660  | 6.326150  | 10.418160 | .29360  |
| <b>H</b> | 1.652250  | 4.029300  | 12.031930 | .08800  |
| <b>C</b> | 0.200000  | 4.985000  | 10.779000 | -.03030 |
| <b>C</b> | -0.894000 | 3.935000  | 10.722000 | .79940  |
| <b>O</b> | -0.622000 | 2.724000  | 10.890000 | -.80140 |
| <b>O</b> | -2.054000 | 4.344000  | 10.493000 | -.80140 |
| <b>H</b> | 0.168790  | 5.536590  | 9.849410  | -.01220 |
| <b>H</b> | -0.022330 | 5.685980  | 11.579840 | -.01220 |
| <b>N</b> | -7.314000 | -2.087000 | 8.008000  | -.39805 |
| <b>C</b> | -6.874000 | -2.459000 | 9.345000  | -.24000 |
| <b>C</b> | -7.932000 | -3.320000 | 10.048000 | .68395  |
| <b>O</b> | -7.826000 | -4.547000 | 10.085000 | -.63955 |
| H        | -7.773032 | -1.192766 | 7.881745  | .22455  |
| H        | -6.014515 | -3.127104 | 9.254645  | .14260  |
| C        | -6.427503 | -1.246085 | 10.199406 | -.00940 |
| C        | -5.001572 | -0.734239 | 9.911078  | .01870  |
| C        | -4.833806 | 0.282055  | 8.774951  | .00000  |
| C        | -3.337661 | 0.623689  | 8.655109  |         |
| N        | -3.096329 | 1.681301  | 7.666140  |         |
| H        | -6.416546 | -1.579088 | 11.239099 | .03620  |
| H        | -7.148463 | -0.431471 | 10.142871 | .03620  |
| H        | -4.359972 | -1.590371 | 9.708036  | .01030  |
| H        | -4.637737 | -0.255558 | 10.821756 | .01030  |
| H        | -5.404313 | 1.183045  | 9.011559  | .06210  |
| H        | -5.192931 | -0.147343 | 7.838096  | .06210  |
| H        | -2.775857 | -0.257828 | 8.390343  |         |
| H        | -2.967611 | 0.992037  | 9.600862  |         |
| H        | -3.135073 | 2.630256  | 8.013858  |         |
| C        | 2.298192  | 5.203132  | -1.522183 |         |
| C        | 2.817682  | 6.203600  | -2.579108 |         |
| C        | 4.079317  | 5.723906  | -3.279462 |         |
| C        | 3.765835  | 4.448944  | -4.046458 |         |
| C        | 2.916246  | 3.463402  | -3.267692 |         |
| C        | 2.268441  | 3.771364  | -2.108319 |         |
| C        | 1.520722  | 2.688343  | -1.419959 |         |
| C        | 1.113595  | 2.626775  | -0.129395 |         |
| C        | 0.346333  | 1.537952  | 0.488527  |         |
| C        | -0.142603 | 1.749029  | 1.745213  |         |
| C        | -1.001963 | 0.841576  | 2.475333  |         |
| C        | -1.509482 | 1.090730  | 3.711569  |         |
| C        | -2.347202 | 0.135785  | 4.424573  |         |

|     |           |           |           |         |
|-----|-----------|-----------|-----------|---------|
| C   | -2.823990 | 0.313371  | 5.694704  |         |
| C   | -2.795549 | 1.551658  | 6.410502  |         |
| C   | 3.215884  | 5.278155  | -0.282021 |         |
| C   | 0.882720  | 5.687846  | -1.143710 |         |
| C   | 2.867169  | 2.090358  | -3.921132 |         |
| C   | 0.087846  | 0.268565  | -0.295222 |         |
| C   | -2.692113 | -1.161208 | 3.740721  |         |
| H   | 3.249819  | 4.695479  | -4.973378 |         |
| H   | 4.685585  | 3.955977  | -4.352906 |         |
| H   | 4.449491  | 6.485213  | -3.958337 |         |
| H   | 4.871160  | 5.539764  | -2.559335 |         |
| H   | 2.972824  | 7.167593  | -2.105155 |         |
| H   | 2.045109  | 6.357800  | -3.329292 |         |
| H   | 0.469657  | 5.185908  | -0.278830 |         |
| H   | 0.917118  | 6.750244  | -0.924442 |         |
| H   | 0.188983  | 5.551722  | -1.967309 |         |
| H   | 2.850779  | 4.689032  | 0.549076  |         |
| H   | 4.216337  | 4.924176  | -0.503485 |         |
| H   | 3.288027  | 6.308051  | 0.059685  |         |
| H   | 1.862330  | 1.689529  | -3.998285 |         |
| H   | 3.262241  | 2.153188  | -4.928812 |         |
| H   | 3.472005  | 1.362441  | -3.387094 |         |
| H   | 1.294684  | 1.838484  | -2.034069 |         |
| H   | 1.319322  | 3.440689  | 0.533819  |         |
| H   | 0.092152  | 2.681089  | 2.232610  |         |
| H   | -1.256286 | -0.079962 | 1.992510  |         |
| H   | -1.231892 | 2.006676  | 4.202846  |         |
| H   | -3.338798 | -0.502248 | 6.166533  |         |
| H   | -0.113417 | -0.573755 | 0.352708  |         |
| H   | -0.752643 | 0.380759  | -0.974979 |         |
| H   | 0.954035  | 0.007867  | -0.890247 |         |
| H   | -3.358636 | -1.759324 | 4.348747  |         |
| H   | -3.187589 | -0.972123 | 2.795638  |         |
| H   | -1.810833 | -1.755408 | 3.528541  |         |
| H   | -2.531133 | 2.457826  | 5.914060  |         |
| O   | -3.359973 | 4.443087  | 8.218378  | -.83400 |
| H   | -3.928414 | 5.215416  | 8.375793  | .41700  |
| H   | -2.840380 | 4.460982  | 9.069092  | .41700  |
| HLA | -4.309605 | 0.401735  | 8.732961  |         |

**ASR<sub>13C</sub>**

| Atom     | x          | y         | z         | charge  |
|----------|------------|-----------|-----------|---------|
| <b>N</b> | -0.148460  | 1.918457  | 13.830959 | -.51630 |
| <b>C</b> | -1.141273  | 0.868683  | 13.996030 | .03810  |
| <b>C</b> | -0.829445  | -0.264696 | 13.024035 | .53660  |
| <b>O</b> | -0.506618  | -1.374576 | 13.452660 | -.58190 |
| <b>H</b> | -0.441152  | 2.826564  | 13.494348 | .29360  |
| <b>H</b> | -1.084336  | 0.477914  | 15.003524 | .08800  |
| <b>C</b> | -2.531083  | 1.469594  | 13.808052 | -.03030 |
| <b>C</b> | -3.686501  | 0.474778  | 13.858206 | .79940  |
| <b>O</b> | -3.520987  | -0.755942 | 13.744513 | -.80140 |
| <b>O</b> | -4.830315  | 0.965505  | 13.840200 | -.80140 |
| <b>H</b> | -2.582850  | 1.971263  | 12.848148 | -.01220 |
| <b>H</b> | -2.676768  | 2.229116  | 14.572980 | -.01220 |
| <b>N</b> | -10.064218 | -5.661172 | 11.035740 | -.39805 |
| <b>C</b> | -9.548768  | -6.042577 | 12.353772 | -.24000 |
| <b>C</b> | -10.604227 | -6.832861 | 13.125663 | .68395  |
| <b>O</b> | -10.477992 | -8.050757 | 13.253906 | -.63955 |
| H        | -10.526994 | -4.764040 | 10.942348 | .22455  |
| H        | -8.717293  | -6.739851 | 12.229213 | .14260  |
| C        | -9.020249  | -4.801072 | 13.095634 | -.00940 |
| C        | -7.754722  | -4.271344 | 12.395425 | .01870  |
| C        | -7.173001  | -3.032185 | 13.076270 | .00000  |
| C        | -5.808295  | -2.656026 | 12.470445 |         |
| N        | -5.934708  | -1.766408 | 11.310702 |         |
| H        | -8.774089  | -5.078928 | 14.120593 | .03620  |
| H        | -9.784904  | -4.024371 | 13.128730 | .03620  |
| H        | -7.974232  | -4.030049 | 11.354771 | .01030  |
| H        | -7.000501  | -5.054168 | 12.424523 | .01030  |
| H        | -7.031278  | -3.259586 | 14.135365 | .06210  |
| H        | -7.876537  | -2.207862 | 12.990814 | .06210  |
| H        | -5.270108  | -3.543764 | 12.183710 |         |
| H        | -5.217772  | -2.111465 | 13.195329 |         |
| H        | -6.016190  | -0.780912 | 11.524685 |         |
| C        | -0.867829  | 1.527060  | 1.809426  |         |
| C        | -0.380480  | 2.418064  | 0.644926  |         |
| C        | 0.841517   | 1.858908  | -0.066471 |         |
| C        | 0.486942   | 0.515797  | -0.686636 |         |
| C        | -0.362137  | -0.371522 | 0.202844  |         |
| C        | -0.958188  | 0.053195  | 1.353605  |         |
| C        | -1.702802  | -0.958270 | 2.145970  |         |
| C        | -2.105065  | -0.950737 | 3.440731  |         |
| C        | -2.850804  | -2.046120 | 4.084587  |         |
| C        | -3.336845  | -1.839747 | 5.342470  |         |
| C        | -4.115829  | -2.782993 | 6.120628  |         |
| C        | -4.581405  | -2.542854 | 7.374950  |         |
| C        | -5.263901  | -3.551692 | 8.180774  |         |

|     |           |           |           |         |
|-----|-----------|-----------|-----------|---------|
| C   | -5.698260 | -3.338620 | 9.460595  |         |
| C   | -5.770779 | -2.037370 | 10.059954 |         |
| C   | 0.106724  | 1.675093  | 2.997469  |         |
| C   | -2.252195 | 2.079235  | 2.208857  |         |
| C   | -0.489538 | -1.789969 | -0.336013 |         |
| C   | -3.064224 | -3.323901 | 3.302084  |         |
| C   | -5.441272 | -4.934738 | 7.602249  |         |
| H   | -0.189686 | 3.418112  | 1.021278  |         |
| H   | -1.185332 | 2.516946  | -0.080927 |         |
| H   | 1.176146  | 2.543641  | -0.838385 |         |
| H   | 1.668567  | 1.741466  | 0.627435  |         |
| H   | 1.390357  | -0.027653 | -0.954615 |         |
| H   | -0.044412 | 0.674630  | -1.624925 |         |
| H   | 0.196230  | 2.722786  | 3.275013  |         |
| H   | -0.228146 | 1.132132  | 3.873313  |         |
| H   | 1.096037  | 1.307029  | 2.751526  |         |
| H   | -2.181139 | 3.154200  | 2.346310  |         |
| H   | -2.985271 | 1.905661  | 1.426948  |         |
| H   | -2.635559 | 1.656425  | 3.128280  |         |
| H   | -0.037222 | -1.854404 | -1.318927 |         |
| H   | 0.018486  | -2.513802 | 0.293889  |         |
| H   | -1.520164 | -2.113628 | -0.439845 |         |
| H   | -1.933540 | -1.848801 | 1.597008  |         |
| H   | -1.913182 | -0.106732 | 4.073820  |         |
| H   | -3.137614 | -0.890417 | 5.811833  |         |
| H   | -4.318098 | -3.736071 | 5.676580  |         |
| H   | -4.355165 | -1.592150 | 7.825402  |         |
| H   | -6.064500 | -4.167751 | 10.036429 |         |
| H   | -5.747454 | -1.174960 | 9.423096  |         |
| H   | -5.921045 | -5.593382 | 8.314263  |         |
| H   | -6.055134 | -4.896437 | 6.708812  |         |
| H   | -4.493050 | -5.375061 | 7.317020  |         |
| H   | -3.504717 | -4.113853 | 3.891881  |         |
| H   | -3.707813 | -3.153155 | 2.444071  |         |
| H   | -2.115773 | -3.696757 | 2.931992  |         |
| O   | -6.026424 | 1.029935  | 11.433211 | -.83400 |
| H   | -6.561891 | 1.840148  | 11.461837 | .41700  |
| H   | -5.534945 | 1.122580  | 12.289983 | .41700  |
| HLA | -6.694584 | -2.900317 | 12.863909 |         |

**ASR<sub>13c</sub>-CI**

| Atom     | x          | y         | z         | charge  |
|----------|------------|-----------|-----------|---------|
| <b>N</b> | -0.148460  | 1.918457  | 13.830959 | -.51630 |
| <b>C</b> | -1.141273  | 0.868683  | 13.996030 | .03810  |
| <b>C</b> | -0.829445  | -0.264696 | 13.024035 | .53660  |
| <b>O</b> | -0.506618  | -1.374576 | 13.452660 | -.58190 |
| <b>H</b> | -0.441152  | 2.826564  | 13.494348 | .29360  |
| <b>H</b> | -1.084336  | 0.477914  | 15.003524 | .08800  |
| <b>C</b> | -2.531083  | 1.469594  | 13.808052 | -.03030 |
| <b>C</b> | -3.686501  | 0.474778  | 13.858206 | .79940  |
| <b>O</b> | -3.520987  | -0.755942 | 13.744513 | -.80140 |
| <b>O</b> | -4.830315  | 0.965505  | 13.840200 | -.80140 |
| <b>H</b> | -2.582850  | 1.971263  | 12.848148 | -.01220 |
| <b>H</b> | -2.676768  | 2.229116  | 14.572980 | -.01220 |
| <b>N</b> | -10.064218 | -5.661172 | 11.035740 | -.39805 |
| <b>C</b> | -9.548768  | -6.042577 | 12.353772 | -.24000 |
| <b>C</b> | -10.604227 | -6.832861 | 13.125663 | .68395  |
| <b>O</b> | -10.477992 | -8.050757 | 13.253906 | -.63955 |
| H        | -10.531088 | -4.766266 | 10.943138 | .22455  |
| H        | -8.716379  | -6.738875 | 12.229024 | .14260  |
| C        | -9.033525  | -4.818940 | 13.134787 | -.00940 |
| C        | -7.751130  | -4.278528 | 12.485561 | .01870  |
| C        | -7.133648  | -3.108288 | 13.261365 | .00000  |
| C        | -5.905581  | -2.535740 | 12.527623 |         |
| N        | -6.325443  | -1.831918 | 11.317948 |         |
| H        | -8.814716  | -5.120240 | 14.159640 | .03620  |
| H        | -9.795827  | -4.039279 | 13.164641 | .03620  |
| H        | -7.979397  | -3.963435 | 11.467560 | .01030  |
| H        | -7.014878  | -5.077888 | 12.447555 | .01030  |
| H        | -6.824586  | -3.464537 | 14.245451 | .06210  |
| H        | -7.883725  | -2.332156 | 13.405103 | .06210  |
| H        | -5.225697  | -3.336383 | 12.282599 |         |
| H        | -5.378353  | -1.833356 | 13.165611 |         |
| H        | -6.774167  | -0.925385 | 11.471072 |         |
| C        | -0.838579  | 1.520072  | 1.810042  |         |
| C        | -0.352668  | 2.450778  | 0.675774  |         |
| C        | 0.875937   | 1.921653  | -0.046951 |         |
| C        | 0.524601   | 0.602978  | -0.718016 |         |
| C        | -0.308027  | -0.321400 | 0.141306  |         |
| C        | -0.907816  | 0.059285  | 1.309719  |         |
| C        | -1.620953  | -0.986330 | 2.062192  |         |
| C        | -2.049934  | -1.029534 | 3.362230  |         |
| C        | -2.752610  | -2.139299 | 3.944295  |         |
| C        | -3.189442  | -2.000742 | 5.273321  |         |
| C        | -3.979071  | -2.880878 | 5.993060  |         |
| C        | -4.304668  | -2.642676 | 7.365789  |         |
| C        | -5.130507  | -3.412070 | 8.127504  |         |

|     |           |           |           |         |
|-----|-----------|-----------|-----------|---------|
| C   | -5.237339 | -3.150122 | 9.574988  |         |
| C   | -6.115507 | -2.157586 | 10.064777 |         |
| C   | 0.124511  | 1.642757  | 3.010279  |         |
| C   | -2.233793 | 2.043318  | 2.212126  |         |
| C   | -0.411618 | -1.724485 | -0.435244 |         |
| C   | -3.023228 | -3.381972 | 3.136659  |         |
| C   | -5.880765 | -4.600679 | 7.570338  |         |
| H   | -0.172456 | 3.439466  | 1.084341  |         |
| H   | -1.154667 | 2.564786  | -0.050525 |         |
| H   | 1.214823  | 2.634155  | -0.790283 |         |
| H   | 1.697405  | 1.776125  | 0.647860  |         |
| H   | 1.426458  | 0.074288  | -1.015822 |         |
| H   | -0.019616 | 0.793678  | -1.642209 |         |
| H   | 0.205093  | 2.682031  | 3.317713  |         |
| H   | -0.215884 | 1.072803  | 3.866958  |         |
| H   | 1.116859  | 1.285158  | 2.762492  |         |
| H   | -2.180950 | 3.115182  | 2.373169  |         |
| H   | -2.957832 | 1.873714  | 1.421340  |         |
| H   | -2.616537 | 1.593636  | 3.119629  |         |
| H   | 0.012132  | -1.746016 | -1.431242 |         |
| H   | 0.134871  | -2.448452 | 0.161372  |         |
| H   | -1.435282 | -2.074510 | -0.516340 |         |
| H   | -1.806059 | -1.874828 | 1.502321  |         |
| H   | -1.892415 | -0.197791 | 4.016594  |         |
| H   | -2.890807 | -1.102176 | 5.780974  |         |
| H   | -4.354636 | -3.761363 | 5.526021  |         |
| H   | -3.821274 | -1.794863 | 7.817986  |         |
| H   | -4.527967 | -3.635678 | 10.241813 |         |
| H   | -6.633368 | -1.549253 | 9.337576  |         |
| H   | -6.516715 | -5.062016 | 8.314761  |         |
| H   | -6.496317 | -4.326271 | 6.720032  |         |
| H   | -5.193215 | -5.365097 | 7.218279  |         |
| H   | -3.368891 | -4.198107 | 3.751615  |         |
| H   | -3.763335 | -3.197624 | 2.364821  |         |
| H   | -2.115271 | -3.714643 | 2.648757  |         |
| O   | -6.174193 | 0.978861  | 11.458840 | -.83400 |
| H   | -6.594821 | 1.853247  | 11.490658 | .41700  |
| H   | -5.616418 | 1.024657  | 12.274639 | .41700  |
| HLA | -6.702561 | -2.907303 | 13.003819 |         |

**ASR<sub>13C</sub>-K**

| Atom     | x          | y         | z         | charge  |
|----------|------------|-----------|-----------|---------|
| <b>N</b> | -0.148460  | 1.918457  | 13.830959 | -.51630 |
| <b>C</b> | -1.141273  | 0.868683  | 13.996030 | .03810  |
| <b>C</b> | -0.829445  | -0.264696 | 13.024035 | .53660  |
| <b>O</b> | -0.506618  | -1.374576 | 13.452660 | -.58190 |
| <b>H</b> | -0.441152  | 2.826564  | 13.494348 | .29360  |
| <b>H</b> | -1.084336  | 0.477914  | 15.003524 | .08800  |
| <b>C</b> | -2.531083  | 1.469594  | 13.808052 | -.03030 |
| <b>C</b> | -3.686501  | 0.474778  | 13.858206 | .79940  |
| <b>O</b> | -3.520987  | -0.755942 | 13.744513 | -.80140 |
| <b>O</b> | -4.830315  | 0.965505  | 13.840200 | -.80140 |
| <b>H</b> | -2.582850  | 1.971263  | 12.848148 | -.01220 |
| <b>H</b> | -2.676768  | 2.229116  | 14.572980 | -.01220 |
| <b>N</b> | -10.064218 | -5.661172 | 11.035740 | -.39805 |
| <b>C</b> | -9.548768  | -6.042577 | 12.353772 | -.24000 |
| <b>C</b> | -10.604227 | -6.832861 | 13.125663 | .68395  |
| <b>O</b> | -10.477992 | -8.050757 | 13.253906 | -.63955 |
| H        | -10.541469 | -4.772058 | 10.944915 | .22455  |
| H        | -8.731347  | -6.755630 | 12.221219 | .14260  |
| C        | -8.999256  | -4.855939 | 13.167860 | -.00940 |
| C        | -7.637761  | -4.442711 | 12.594133 | .01870  |
| C        | -7.002167  | -3.213951 | 13.284022 | .00000  |
| C        | -6.062167  | -2.421550 | 12.345171 |         |
| N        | -6.842767  | -2.021040 | 11.171712 |         |
| H        | -8.869126  | -5.162242 | 14.207214 | .03620  |
| H        | -9.700701  | -4.021585 | 13.141201 | .03620  |
| H        | -7.785191  | -4.269982 | 11.531115 | .01030  |
| H        | -6.946368  | -5.274941 | 12.679937 | .01030  |
| H        | -6.443601  | -3.548786 | 14.159819 | .06210  |
| H        | -7.795278  | -2.551350 | 13.639610 | .06210  |
| H        | -5.236968  | -3.040875 | 12.029209 |         |
| H        | -5.665532  | -1.550463 | 12.852424 |         |
| H        | -7.795138  | -1.786298 | 11.384025 |         |
| C        | -0.726279  | 1.534774  | 1.591517  |         |
| C        | -0.289624  | 2.491214  | 0.459517  |         |
| C        | 0.971860   | 2.027539  | -0.253017 |         |
| C        | 0.709379   | 0.687210  | -0.924431 |         |
| C        | -0.103957  | -0.272930 | -0.080303 |         |
| C        | -0.743890  | 0.077783  | 1.067760  |         |
| C        | -1.497473  | -0.988142 | 1.786272  |         |
| C        | -1.734222  | -1.097248 | 3.112706  |         |
| C        | -2.549982  | -2.128319 | 3.772586  |         |
| C        | -2.815257  | -1.928396 | 5.094247  |         |
| C        | -3.750944  | -2.639482 | 5.943174  |         |
| C        | -3.967153  | -2.253993 | 7.230194  |         |
| C        | -5.060504  | -2.714002 | 8.068327  |         |

|     |           |           |           |         |
|-----|-----------|-----------|-----------|---------|
| C   | -5.242389 | -2.173802 | 9.310448  |         |
| C   | -6.549035 | -2.083801 | 9.920126  |         |
| C   | 0.247936  | 1.696974  | 2.780188  |         |
| C   | -2.130103 | 1.998933  | 2.029810  |         |
| C   | -0.162173 | -1.680467 | -0.654207 |         |
| C   | -3.070251 | -3.295603 | 2.963732  |         |
| C   | -5.972026 | -3.808766 | 7.575252  |         |
| H   | -0.161819 | 3.488688  | 0.868035  |         |
| H   | -1.093324 | 2.562884  | -0.270888 |         |
| H   | 1.277698  | 2.756562  | -0.995283 |         |
| H   | 1.793681  | 1.936123  | 0.450892  |         |
| H   | 1.648764  | 0.208960  | -1.191444 |         |
| H   | 0.186985  | 0.845881  | -1.867429 |         |
| H   | 0.336785  | 2.748841  | 3.040988  |         |
| H   | -0.091622 | 1.175869  | 3.666790  |         |
| H   | 1.237121  | 1.321378  | 2.546003  |         |
| H   | -2.102177 | 3.063293  | 2.245313  |         |
| H   | -2.860555 | 1.852439  | 1.239681  |         |
| H   | -2.488594 | 1.491407  | 2.916922  |         |
| H   | 0.393054  | -1.729919 | -1.583638 |         |
| H   | 0.271669  | -2.413306 | 0.018481  |         |
| H   | -1.177835 | -2.000300 | -0.870333 |         |
| H   | -1.880789 | -1.771718 | 1.158965  |         |
| H   | -1.358030 | -0.347886 | 3.779812  |         |
| H   | -2.349540 | -1.077828 | 5.562333  |         |
| H   | -4.335087 | -3.430137 | 5.511972  |         |
| H   | -3.362582 | -1.461895 | 7.638545  |         |
| H   | -4.487650 | -1.557921 | 9.757345  |         |
| H   | -7.385474 | -1.930915 | 9.261037  |         |
| H   | -6.836402 | -3.932284 | 8.219542  |         |
| H   | -6.311473 | -3.637624 | 6.564388  |         |
| H   | -5.430461 | -4.748479 | 7.589247  |         |
| H   | -3.531346 | -4.052643 | 3.583716  |         |
| H   | -3.793883 | -2.985417 | 2.215512  |         |
| H   | -2.251936 | -3.772325 | 2.433632  |         |
| O   | -6.014478 | 0.996942  | 11.337905 | -.83400 |
| H   | -6.517557 | 1.815645  | 11.449616 | .41700  |
| H   | -5.516344 | 0.978569  | 12.187722 | .41700  |
| HLA | -6.669823 | -2.933787 | 12.952104 |         |



**ASR<sub>13C</sub>-L**

| Atom     | x          | y         | z         | charge  |
|----------|------------|-----------|-----------|---------|
| <b>N</b> | -0.148460  | 1.918457  | 13.830959 | -.51630 |
| <b>C</b> | -1.141273  | 0.868683  | 13.996030 | .03810  |
| <b>C</b> | -0.829445  | -0.264696 | 13.024035 | .53660  |
| <b>O</b> | -0.506618  | -1.374576 | 13.452660 | -.58190 |
| <b>H</b> | -0.441152  | 2.826564  | 13.494348 | .29360  |
| <b>H</b> | -1.084336  | 0.477914  | 15.003524 | .08800  |
| <b>C</b> | -2.531083  | 1.469594  | 13.808052 | -.03030 |
| <b>C</b> | -3.686501  | 0.474778  | 13.858206 | .79940  |
| <b>O</b> | -3.520987  | -0.755942 | 13.744513 | -.80140 |
| <b>O</b> | -4.830315  | 0.965505  | 13.840200 | -.80140 |
| <b>H</b> | -2.582850  | 1.971263  | 12.848148 | -.01220 |
| <b>H</b> | -2.676768  | 2.229116  | 14.572980 | -.01220 |
| <b>N</b> | -10.064218 | -5.661172 | 11.035740 | -.39805 |
| <b>C</b> | -9.548768  | -6.042577 | 12.353772 | -.24000 |
| <b>C</b> | -10.604227 | -6.832861 | 13.125663 | .68395  |
| <b>O</b> | -10.477992 | -8.050757 | 13.253906 | -.63955 |
| H        | -10.529580 | -4.765354 | 10.942442 | .22455  |
| H        | -8.703206  | -6.724529 | 12.239344 | .14260  |
| C        | -9.078787  | -4.797987 | 13.116266 | -.00940 |
| C        | -7.791551  | -4.264384 | 12.478745 | .01870  |
| C        | -7.440135  | -2.877920 | 13.013612 | .00000  |
| C        | -5.966678  | -2.579924 | 12.710074 |         |
| N        | -5.783686  | -2.068077 | 11.349706 |         |
| H        | -8.877145  | -5.062757 | 14.155348 | .03620  |
| H        | -9.856565  | -4.033841 | 13.105087 | .03620  |
| H        | -7.897793  | -4.197771 | 11.395444 | .01030  |
| H        | -6.985415  | -4.961577 | 12.704303 | .01030  |
| H        | -7.599200  | -2.855472 | 14.095204 | .06210  |
| H        | -8.090454  | -2.145320 | 12.535341 | .06210  |
| H        | -5.381038  | -3.477120 | 12.833496 |         |
| H        | -5.582990  | -1.825998 | 13.379779 |         |
| H        | -5.772604  | -1.056889 | 11.265796 |         |
| C        | -0.641728  | 1.596666  | 1.403898  |         |
| C        | -0.163834  | 2.541832  | 0.279094  |         |
| C        | 1.112012   | 2.064122  | -0.397393 |         |
| C        | 0.861756   | 0.718728  | -1.061803 |         |
| C        | 0.031475   | -0.232068 | -0.225373 |         |
| C        | -0.655258  | 0.136920  | 0.890452  |         |
| C        | -1.429223  | -0.922782 | 1.589412  |         |
| C        | -1.786581  | -0.992684 | 2.890478  |         |
| C        | -2.562072  | -2.072999 | 3.518095  |         |
| C        | -2.983665  | -1.843511 | 4.790412  |         |
| C        | -3.827877  | -2.659454 | 5.639671  |         |
| C        | -4.188967  | -2.186612 | 6.859890  |         |
| C        | -4.939434  | -2.880693 | 7.890681  |         |

|     |           |           |           |         |
|-----|-----------|-----------|-----------|---------|
| C   | -5.133878 | -2.204158 | 9.061038  |         |
| C   | -5.543586 | -2.779932 | 10.302795 |         |
| C   | 0.301547  | 1.748998  | 2.617548  |         |
| C   | -2.049809 | 2.086350  | 1.800480  |         |
| C   | -0.006026 | -1.647328 | -0.782029 |         |
| C   | -2.883373 | -3.324245 | 2.733890  |         |
| C   | -5.430813 | -4.285552 | 7.645454  |         |
| H   | -0.037939 | 3.539968  | 0.686674  |         |
| H   | -0.947269 | 2.616381  | -0.472735 |         |
| H   | 1.439300  | 2.782779  | -1.140432 |         |
| H   | 1.916332  | 1.977115  | 0.326909  |         |
| H   | 1.806534  | 0.239588  | -1.305651 |         |
| H   | 0.357966  | 0.868051  | -2.016294 |         |
| H   | 0.369987  | 2.796639  | 2.900958  |         |
| H   | -0.049379 | 1.201344  | 3.483909  |         |
| H   | 1.300310  | 1.390536  | 2.397544  |         |
| H   | -2.018796 | 3.159993  | 1.960698  |         |
| H   | -2.772826 | 1.902555  | 1.012024  |         |
| H   | -2.424907 | 1.628899  | 2.707384  |         |
| H   | 0.699267  | -1.747862 | -1.598230 |         |
| H   | 0.258692  | -2.391647 | -0.039276 |         |
| H   | -0.987800 | -1.909323 | -1.169715 |         |
| H   | -1.715988 | -1.751339 | 0.969814  |         |
| H   | -1.526341 | -0.195880 | 3.558293  |         |
| H   | -2.688986 | -0.909632 | 5.238348  |         |
| H   | -4.166053 | -3.618429 | 5.293540  |         |
| H   | -3.814010 | -1.217557 | 7.140478  |         |
| H   | -4.811882 | -1.180222 | 9.114873  |         |
| H   | -5.599023 | -3.844774 | 10.426877 |         |
| H   | -5.877176 | -4.735171 | 8.523429  |         |
| H   | -6.182160 | -4.282650 | 6.862253  |         |
| H   | -4.618754 | -4.919467 | 7.313583  |         |
| H   | -3.257979 | -4.115080 | 3.370262  |         |
| H   | -3.624905 | -3.135501 | 1.962262  |         |
| H   | -1.992243 | -3.700447 | 2.242750  |         |
| O   | -5.967892 | 0.762315  | 11.447103 | -.83400 |
| H   | -6.601568 | 1.490791  | 11.534507 | .41700  |
| H   | -5.463368 | 0.897582  | 12.291912 | .41700  |
| HLA | -6.927443 | -2.774223 | 12.908011 |         |

**ASR<sub>AT</sub><sup>-</sup>(-161) Structure along the photoisomerization path of ASR<sub>AT</sub> with a C<sub>12</sub>-C<sub>13</sub>-C<sub>14</sub>-C<sub>15</sub> dihedral angle of -161°**

| Atom | x         | y         | z         | charge  |
|------|-----------|-----------|-----------|---------|
| N    | 2.593000  | 5.425000  | 10.766000 | -.51630 |
| C    | 1.598000  | 4.397000  | 11.015000 | .03810  |
| C    | 1.894000  | 3.247000  | 10.041000 | .53660  |
| O    | 2.171000  | 2.124000  | 10.461000 | -.58190 |
| H    | 2.294660  | 6.326150  | 10.418160 | .29360  |
| H    | 1.652250  | 4.029300  | 12.031930 | .08800  |
| C    | 0.200000  | 4.985000  | 10.779000 | -.03030 |
| C    | -0.894000 | 3.935000  | 10.722000 | .79940  |
| O    | -0.622000 | 2.724000  | 10.890000 | -.80140 |
| O    | -2.054000 | 4.344000  | 10.493000 | -.80140 |
| H    | 0.168790  | 5.536590  | 9.849410  | -.01220 |
| H    | -0.022330 | 5.685980  | 11.579840 | -.01220 |
| N    | -7.314000 | -2.087000 | 8.008000  | -.39805 |
| C    | -6.874000 | -2.459000 | 9.345000  | -.24000 |
| C    | -7.932000 | -3.320000 | 10.048000 | .68395  |
| O    | -7.826000 | -4.547000 | 10.085000 | -.63955 |
| H    | -7.762119 | -1.187748 | 7.878728  | .22455  |
| H    | -5.997793 | -3.106321 | 9.266548  | .14260  |
| C    | -6.502454 | -1.248131 | 10.243021 | -.00940 |
| C    | -5.082233 | -0.688876 | 10.081239 | .01870  |
| C    | -4.901988 | 0.342803  | 8.973921  | .00000  |
| C    | -3.448480 | 0.828267  | 9.007722  |         |
| N    | -3.099880 | 1.523888  | 7.787061  |         |
| H    | -6.550027 | -1.592622 | 11.278361 | .03620  |
| H    | -7.237710 | -0.449625 | 10.153035 | .03620  |
| H    | -4.396646 | -1.514416 | 9.897479  | .01030  |
| H    | -4.803528 | -0.212238 | 11.023064 | .01030  |
| H    | -5.568270 | 1.189728  | 9.138455  | .06210  |
| H    | -5.128130 | -0.125138 | 8.013815  | .06210  |
| H    | -2.785934 | -0.017624 | 9.133345  |         |
| H    | -3.302756 | 1.492000  | 9.846914  |         |
| H    | -3.102684 | 2.528169  | 7.798362  |         |
| C    | 2.512512  | 5.362729  | -1.710517 |         |
| C    | 3.128468  | 6.423024  | -2.652503 |         |
| C    | 4.388413  | 5.945605  | -3.355946 |         |
| C    | 4.028468  | 4.783902  | -4.266318 |         |
| C    | 3.160688  | 3.746600  | -3.594450 |         |
| C    | 2.495568  | 3.968899  | -2.391218 |         |
| C    | 1.831632  | 2.849525  | -1.806964 |         |
| C    | 1.228115  | 2.761508  | -0.533066 |         |
| C    | 0.579336  | 1.669332  | 0.010860  |         |
| C    | 0.033501  | 1.879719  | 1.353396  |         |
| C    | -0.728466 | 1.038562  | 2.086146  |         |
| C    | -1.226161 | 1.474116  | 3.398381  |         |

|     |           |           |           |         |
|-----|-----------|-----------|-----------|---------|
| C   | -1.973208 | 0.760960  | 4.278601  |         |
| C   | -2.351560 | 1.452386  | 5.507112  |         |
| C   | -2.772998 | 0.863808  | 6.670480  |         |
| C   | 3.342195  | 5.323509  | -0.411150 |         |
| C   | 1.083828  | 5.861763  | -1.410553 |         |
| C   | 3.106945  | 2.436505  | -4.352172 |         |
| C   | 0.350009  | 0.357450  | -0.695553 |         |
| C   | -2.434286 | -0.652225 | 3.996304  |         |
| H   | 3.498329  | 5.154136  | -5.144668 |         |
| H   | 4.920674  | 4.302099  | -4.659464 |         |
| H   | 4.821138  | 6.753653  | -3.936644 |         |
| H   | 5.146375  | 5.640511  | -2.639856 |         |
| H   | 3.312687  | 7.327147  | -2.081940 |         |
| H   | 2.396487  | 6.695252  | -3.409116 |         |
| H   | 0.586859  | 5.334303  | -0.607971 |         |
| H   | 1.129233  | 6.908973  | -1.133658 |         |
| H   | 0.453227  | 5.793953  | -2.290097 |         |
| H   | 2.935371  | 4.662365  | 0.341678  |         |
| H   | 4.359768  | 4.996678  | -0.596596 |         |
| H   | 3.380504  | 6.319084  | 0.023278  |         |
| H   | 2.122709  | 1.983857  | -4.372658 |         |
| H   | 3.401406  | 2.610624  | -5.380863 |         |
| H   | 3.804825  | 1.708478  | -3.940221 |         |
| H   | 1.816808  | 1.948154  | -2.386391 |         |
| H   | 1.266743  | 3.619138  | 0.099910  |         |
| H   | 0.247942  | 2.841093  | 1.786386  |         |
| H   | -0.993556 | 0.064801  | 1.724492  |         |
| H   | -0.955494 | 2.477368  | 3.674879  |         |
| H   | -2.193081 | 2.516405  | 5.517977  |         |
| H   | 0.408799  | -0.468786 | 0.004727  |         |
| H   | -0.639423 | 0.336376  | -1.148582 |         |
| H   | 1.074000  | 0.179874  | -1.479409 |         |
| H   | -2.756501 | -1.170468 | 4.891154  |         |
| H   | -3.274560 | -0.636682 | 3.309144  |         |
| H   | -1.651505 | -1.249108 | 3.545479  |         |
| H   | -2.842040 | -0.202041 | 6.754862  |         |
| O   | -3.329645 | 4.404312  | 8.192374  | -.83400 |
| H   | -3.933563 | 5.131281  | 8.401808  | .41700  |
| H   | -2.815355 | 4.381769  | 9.044407  | .41700  |
| HLA | -4.396739 | 0.511535  | 8.985673  |         |

**ASR<sub>AT</sub><sup>-</sup>(-140) Structure along the photoisomerization path of ASR<sub>AT</sub> with a C<sub>12</sub>-C<sub>13</sub>-C<sub>14</sub>-C<sub>15</sub> dihedral angle of -140°**

| Atom | x         | y         | z         | charge  |
|------|-----------|-----------|-----------|---------|
| N    | 2.593000  | 5.425000  | 10.766000 | -.51630 |
| C    | 1.598000  | 4.397000  | 11.015000 | .03810  |
| C    | 1.894000  | 3.247000  | 10.041000 | .53660  |
| O    | 2.171000  | 2.124000  | 10.461000 | -.58190 |
| H    | 2.294660  | 6.326150  | 10.418160 | .29360  |
| H    | 1.652250  | 4.029300  | 12.031930 | .08800  |
| C    | 0.200000  | 4.985000  | 10.779000 | -.03030 |
| C    | -0.894000 | 3.935000  | 10.722000 | .79940  |
| O    | -0.622000 | 2.724000  | 10.890000 | -.80140 |
| O    | -2.054000 | 4.344000  | 10.493000 | -.80140 |
| H    | 0.168790  | 5.536590  | 9.849410  | -.01220 |
| H    | -0.022330 | 5.685980  | 11.579840 | -.01220 |
| N    | -7.314000 | -2.087000 | 8.008000  | -.39805 |
| C    | -6.874000 | -2.459000 | 9.345000  | -.24000 |
| C    | -7.932000 | -3.320000 | 10.048000 | .68395  |
| O    | -7.826000 | -4.547000 | 10.085000 | -.63955 |
| H    | -7.762150 | -1.187771 | 7.878616  | .22455  |
| H    | -6.003542 | -3.113588 | 9.262860  | .14260  |
| C    | -6.485726 | -1.253520 | 10.241221 | -.00940 |
| C    | -5.053463 | -0.731139 | 10.071276 | .01870  |
| C    | -4.858493 | 0.289912  | 8.961160  | .00000  |
| C    | -3.382286 | 0.708872  | 8.957139  |         |
| N    | -3.055012 | 1.391721  | 7.728337  |         |
| H    | -6.539673 | -1.592588 | 11.277650 | .03620  |
| H    | -7.203302 | -0.440019 | 10.146310 | .03620  |
| H    | -4.390992 | -1.573635 | 9.880515  | .01030  |
| H    | -4.752673 | -0.256670 | 11.006752 | .01030  |
| H    | -5.486241 | 1.164073  | 9.136895  | .06210  |
| H    | -5.131332 | -0.169429 | 8.007348  | .06210  |
| H    | -2.754214 | -0.169296 | 9.035808  |         |
| H    | -3.166981 | 1.349308  | 9.799341  |         |
| H    | -3.161047 | 2.394595  | 7.690161  |         |
| C    | 2.386473  | 5.292878  | -1.641217 |         |
| C    | 2.917563  | 6.339435  | -2.645878 |         |
| C    | 4.187650  | 5.892638  | -3.353194 |         |
| C    | 3.871846  | 4.678573  | -4.211231 |         |
| C    | 3.058403  | 3.637466  | -3.485695 |         |
| C    | 2.425650  | 3.878200  | -2.274366 |         |
| C    | 1.843169  | 2.746944  | -1.631608 |         |
| C    | 1.320077  | 2.658021  | -0.335166 |         |
| C    | 0.741238  | 1.534413  | 0.222080  |         |
| C    | 0.167465  | 1.726142  | 1.537981  |         |
| C    | -0.645276 | 0.868876  | 2.187663  |         |
| C    | -1.285486 | 1.306497  | 3.420991  |         |

|     |           |           |           |         |
|-----|-----------|-----------|-----------|---------|
| C   | -2.114742 | 0.577241  | 4.193276  |         |
| C   | -2.612999 | 1.253855  | 5.389584  |         |
| C   | -2.770728 | 0.691388  | 6.626742  |         |
| C   | 3.250937  | 5.354631  | -0.364534 |         |
| C   | 0.942350  | 5.725010  | -1.305739 |         |
| C   | 3.042817  | 2.295225  | -4.189545 |         |
| C   | 0.572109  | 0.210580  | -0.475213 |         |
| C   | -2.489693 | -0.841454 | 3.856182  |         |
| H   | 3.323413  | 4.986472  | -5.101597 |         |
| H   | 4.781975  | 4.213936  | -4.582860 |         |
| H   | 4.575498  | 6.691512  | -3.974887 |         |
| H   | 4.967357  | 5.652262  | -2.636003 |         |
| H   | 3.064471  | 7.278859  | -2.124201 |         |
| H   | 2.154033  | 6.531007  | -3.396457 |         |
| H   | 0.514126  | 5.206080  | -0.457976 |         |
| H   | 0.938103  | 6.784697  | -1.073335 |         |
| H   | 0.278242  | 5.581462  | -2.151209 |         |
| H   | 2.880782  | 4.726680  | 0.434691  |         |
| H   | 4.273191  | 5.048503  | -0.556484 |         |
| H   | 3.264807  | 6.374041  | 0.010933  |         |
| H   | 2.090278  | 1.782343  | -4.135536 |         |
| H   | 3.269796  | 2.443315  | -5.238655 |         |
| H   | 3.804988  | 1.628822  | -3.789300 |         |
| H   | 1.828029  | 1.834884  | -2.190409 |         |
| H   | 1.342567  | 3.520051  | 0.293325  |         |
| H   | 0.331871  | 2.687858  | 1.991549  |         |
| H   | -0.867791 | -0.102808 | 1.796615  |         |
| H   | -1.085897 | 2.321323  | 3.709383  |         |
| H   | -2.698987 | 2.321927  | 5.320923  |         |
| H   | 0.573079  | -0.599409 | 0.243467  |         |
| H   | -0.371356 | 0.181044  | -1.015327 |         |
| H   | 1.366108  | 0.021275  | -1.183459 |         |
| H   | -3.114093 | -1.277157 | 4.624121  |         |
| H   | -3.049814 | -0.871172 | 2.927172  |         |
| H   | -1.609946 | -1.460709 | 3.726300  |         |
| H   | -2.651954 | -0.366700 | 6.781387  |         |
| O   | -3.336771 | 4.266828  | 8.196687  | -.83400 |
| H   | -3.943986 | 4.983533  | 8.431189  | .41700  |
| H   | -2.791643 | 4.263707  | 9.030281  | .41700  |
| HLA | -4.344285 | 0.435831  | 8.959763  |         |

**ASR<sub>AT</sub><sup>-</sup>(-125) Structure along the photoisomerization path of ASR<sub>AT</sub> with a C<sub>12</sub>-C<sub>13</sub>-C<sub>14</sub>-C<sub>15</sub> dihedral angle of -125°**

| Atom | x         | y         | z         | charge  |
|------|-----------|-----------|-----------|---------|
| N    | 2.593000  | 5.425000  | 10.766000 | -.51630 |
| C    | 1.598000  | 4.397000  | 11.015000 | .03810  |
| C    | 1.894000  | 3.247000  | 10.041000 | .53660  |
| O    | 2.171000  | 2.124000  | 10.461000 | -.58190 |
| H    | 2.294660  | 6.326150  | 10.418160 | .29360  |
| H    | 1.652250  | 4.029300  | 12.031930 | .08800  |
| C    | 0.200000  | 4.985000  | 10.779000 | -.03030 |
| C    | -0.894000 | 3.935000  | 10.722000 | .79940  |
| O    | -0.622000 | 2.724000  | 10.890000 | -.80140 |
| O    | -2.054000 | 4.344000  | 10.493000 | -.80140 |
| H    | 0.168790  | 5.536590  | 9.849410  | -.01220 |
| H    | -0.022330 | 5.685980  | 11.579840 | -.01220 |
| N    | -7.314000 | -2.087000 | 8.008000  | -.39805 |
| C    | -6.874000 | -2.459000 | 9.345000  | -.24000 |
| C    | -7.932000 | -3.320000 | 10.048000 | .68395  |
| O    | -7.826000 | -4.547000 | 10.085000 | -.63955 |
| H    | -7.765246 | -1.189321 | 7.878867  | .22455  |
| H    | -6.004646 | -3.115018 | 9.262248  | .14260  |
| C    | -6.477424 | -1.250143 | 10.237772 | -.00940 |
| C    | -5.040710 | -0.725712 | 10.082858 | .01870  |
| C    | -4.829845 | 0.304602  | 8.983782  | .00000  |
| C    | -3.358100 | 0.742513  | 8.986594  |         |
| N    | -3.050021 | 1.421262  | 7.746250  |         |
| H    | -6.539380 | -1.585836 | 11.274913 | .03620  |
| H    | -7.191872 | -0.434420 | 10.137761 | .03620  |
| H    | -4.376295 | -1.566126 | 9.891099  | .01030  |
| H    | -4.748959 | -0.257678 | 11.024803 | .01030  |
| H    | -5.467770 | 1.173138  | 9.154929  | .06210  |
| H    | -5.086752 | -0.153795 | 8.025874  | .06210  |
| H    | -2.717931 | -0.125164 | 9.072091  |         |
| H    | -3.160641 | 1.399208  | 9.823138  |         |
| H    | -3.350135 | 2.384504  | 7.659530  |         |
| C    | 2.391807  | 5.294941  | -1.647820 |         |
| C    | 2.929017  | 6.340503  | -2.649938 |         |
| C    | 4.199148  | 5.893547  | -3.356579 |         |
| C    | 3.878402  | 4.678780  | -4.210596 |         |
| C    | 3.064322  | 3.637987  | -3.479992 |         |
| C    | 2.423065  | 3.881679  | -2.282761 |         |
| C    | 1.808089  | 2.750756  | -1.632162 |         |
| C    | 1.297581  | 2.657338  | -0.343835 |         |
| C    | 0.727198  | 1.520277  | 0.233631  |         |
| C    | 0.196746  | 1.709484  | 1.552797  |         |
| C    | -0.554335 | 0.828801  | 2.259760  |         |
| C    | -1.160089 | 1.252441  | 3.507989  |         |

|     |           |           |           |         |
|-----|-----------|-----------|-----------|---------|
| C   | -2.069709 | 0.563024  | 4.223526  |         |
| C   | -2.627478 | 1.278959  | 5.399636  |         |
| C   | -2.597677 | 0.769769  | 6.678093  |         |
| C   | 3.259461  | 5.352434  | -0.372112 |         |
| C   | 0.946452  | 5.732966  | -1.322529 |         |
| C   | 3.051306  | 2.298190  | -4.193303 |         |
| C   | 0.560458  | 0.196881  | -0.468607 |         |
| C   | -2.615684 | -0.781693 | 3.793375  |         |
| H   | 3.327274  | 4.988963  | -5.097503 |         |
| H   | 4.787695  | 4.217327  | -4.587431 |         |
| H   | 4.583469  | 6.692933  | -3.980333 |         |
| H   | 4.981406  | 5.652750  | -2.642382 |         |
| H   | 3.073367  | 7.281323  | -2.130215 |         |
| H   | 2.168335  | 6.526896  | -3.404164 |         |
| H   | 0.505968  | 5.215197  | -0.480211 |         |
| H   | 0.937809  | 6.793696  | -1.095659 |         |
| H   | 0.294171  | 5.584707  | -2.176269 |         |
| H   | 2.892839  | 4.723396  | 0.428300  |         |
| H   | 4.277748  | 5.039597  | -0.573989 |         |
| H   | 3.285701  | 6.371404  | 0.005082  |         |
| H   | 2.092756  | 1.794379  | -4.163970 |         |
| H   | 3.297664  | 2.453746  | -5.237154 |         |
| H   | 3.797566  | 1.616011  | -3.790101 |         |
| H   | 1.779841  | 1.845988  | -2.199290 |         |
| H   | 1.312444  | 3.514868  | 0.291771  |         |
| H   | 0.363941  | 2.673893  | 2.000078  |         |
| H   | -0.768879 | -0.146019 | 1.874846  |         |
| H   | -0.875677 | 2.230606  | 3.856090  |         |
| H   | -3.108796 | 2.231659  | 5.235443  |         |
| H   | 0.578402  | -0.619237 | 0.242349  |         |
| H   | -0.389818 | 0.161487  | -0.994153 |         |
| H   | 1.341218  | 0.017835  | -1.195556 |         |
| H   | -3.268883 | -1.211060 | 4.542361  |         |
| H   | -3.183162 | -0.681451 | 2.873165  |         |
| H   | -1.821519 | -1.494768 | 3.601550  |         |
| H   | -2.180922 | -0.203546 | 6.867407  |         |
| O   | -3.383475 | 4.281145  | 8.203109  | -.83400 |
| H   | -3.940677 | 5.040475  | 8.432130  | .41700  |
| H   | -2.813439 | 4.274662  | 9.019044  | .41700  |
| HLA | -4.316565 | 0.457308  | 8.984767  |         |



**ASR<sub>AT</sub><sup>-</sup>(-110) Structure along the photoisomerization path of ASR<sub>AT</sub> with a C<sub>12</sub>-C<sub>13</sub>-C<sub>14</sub>-C<sub>15</sub> dihedral angle of -110°**

| Atom | x         | y         | z         | charge  |
|------|-----------|-----------|-----------|---------|
| N    | 2.593000  | 5.425000  | 10.766000 | -.51630 |
| C    | 1.598000  | 4.397000  | 11.015000 | .03810  |
| C    | 1.894000  | 3.247000  | 10.041000 | .53660  |
| O    | 2.171000  | 2.124000  | 10.461000 | -.58190 |
| H    | 2.294660  | 6.326150  | 10.418160 | .29360  |
| H    | 1.652250  | 4.029300  | 12.031930 | .08800  |
| C    | 0.200000  | 4.985000  | 10.779000 | -.03030 |
| C    | -0.894000 | 3.935000  | 10.722000 | .79940  |
| O    | -0.622000 | 2.724000  | 10.890000 | -.80140 |
| O    | -2.054000 | 4.344000  | 10.493000 | -.80140 |
| H    | 0.168790  | 5.536590  | 9.849410  | -.01220 |
| H    | -0.022330 | 5.685980  | 11.579840 | -.01220 |
| N    | -7.314000 | -2.087000 | 8.008000  | -.39805 |
| C    | -6.874000 | -2.459000 | 9.345000  | -.24000 |
| C    | -7.932000 | -3.320000 | 10.048000 | .68395  |
| O    | -7.826000 | -4.547000 | 10.085000 | -.63955 |
| H    | -7.773576 | -1.193416 | 7.879944  | .22455  |
| H    | -6.004582 | -3.115159 | 9.263441  | .14260  |
| C    | -6.483977 | -1.252684 | 10.243006 | -.00940 |
| C    | -5.043703 | -0.733525 | 10.098883 | .01870  |
| C    | -4.816253 | 0.301157  | 9.004732  | .00000  |
| C    | -3.342841 | 0.757718  | 9.013995  |         |
| N    | -3.049570 | 1.453161  | 7.767157  |         |
| H    | -6.555057 | -1.592001 | 11.278875 | .03620  |
| H    | -7.198275 | -0.436728 | 10.142058 | .03620  |
| H    | -4.385048 | -1.578094 | 9.907782  | .01030  |
| H    | -4.757511 | -0.273011 | 11.045945 | .01030  |
| H    | -5.468431 | 1.160053  | 9.171799  | .06210  |
| H    | -5.067487 | -0.158414 | 8.045618  | .06210  |
| H    | -2.693696 | -0.105076 | 9.087288  |         |
| H    | -3.153487 | 1.407269  | 9.859698  |         |
| H    | -3.429119 | 2.401042  | 7.668751  |         |
| C    | 2.403441  | 5.296612  | -1.668265 |         |
| C    | 2.939981  | 6.347929  | -2.666329 |         |
| C    | 4.214115  | 5.903514  | -3.366020 |         |
| C    | 3.885078  | 4.692610  | -4.220271 |         |
| C    | 3.073025  | 3.650633  | -3.487290 |         |
| C    | 2.434387  | 3.883724  | -2.296931 |         |
| C    | 1.799341  | 2.743185  | -1.633719 |         |
| C    | 1.288596  | 2.652485  | -0.357773 |         |
| C    | 0.705454  | 1.508033  | 0.250233  |         |
| C    | 0.204530  | 1.686678  | 1.565795  |         |
| C    | -0.504694 | 0.787899  | 2.325095  |         |
| C    | -1.067296 | 1.195196  | 3.587125  |         |

|     |           |           |           |         |
|-----|-----------|-----------|-----------|---------|
| C   | -2.055085 | 0.556262  | 4.259453  |         |
| C   | -2.658029 | 1.255002  | 5.411153  |         |
| C   | -2.471812 | 0.857661  | 6.743290  |         |
| C   | 3.267486  | 5.353724  | -0.391946 |         |
| C   | 0.959569  | 5.730852  | -1.340404 |         |
| C   | 3.065151  | 2.318568  | -4.210857 |         |
| C   | 0.557552  | 0.193722  | -0.469171 |         |
| C   | -2.698644 | -0.724541 | 3.775988  |         |
| H   | 3.332072  | 5.008845  | -5.102947 |         |
| H   | 4.790283  | 4.228218  | -4.601612 |         |
| H   | 4.608594  | 6.701449  | -3.985828 |         |
| H   | 4.988626  | 5.655435  | -2.646208 |         |
| H   | 3.076054  | 7.288067  | -2.143703 |         |
| H   | 2.184227  | 6.531713  | -3.426150 |         |
| H   | 0.528100  | 5.204425  | -0.499520 |         |
| H   | 0.947429  | 6.790436  | -1.110968 |         |
| H   | 0.307110  | 5.577042  | -2.192718 |         |
| H   | 2.891488  | 4.722894  | 0.402249  |         |
| H   | 4.283449  | 5.032691  | -0.591761 |         |
| H   | 3.296555  | 6.372470  | -0.015077 |         |
| H   | 2.101975  | 1.823273  | -4.199338 |         |
| H   | 3.329519  | 2.482133  | -5.248939 |         |
| H   | 3.799714  | 1.630232  | -3.799120 |         |
| H   | 1.777327  | 1.844976  | -2.208242 |         |
| H   | 1.316650  | 3.511068  | 0.274099  |         |
| H   | 0.347978  | 2.661865  | 1.995592  |         |
| H   | -0.716448 | -0.188630 | 1.950655  |         |
| H   | -0.734134 | 2.148849  | 3.957508  |         |
| H   | -3.428915 | 1.990731  | 5.203645  |         |
| H   | 0.615898  | -0.634904 | 0.223487  |         |
| H   | -0.394736 | 0.137338  | -0.987459 |         |
| H   | 1.333204  | 0.060970  | -1.210563 |         |
| H   | -3.373173 | -1.139611 | 4.513825  |         |
| H   | -3.258278 | -0.558182 | 2.862381  |         |
| H   | -1.955375 | -1.482390 | 3.551701  |         |
| H   | -1.904429 | -0.034914 | 6.968242  |         |
| O   | -3.391731 | 4.267649  | 8.208476  | -.83400 |
| H   | -3.943773 | 5.040521  | 8.408192  | .41700  |
| H   | -2.825919 | 4.289466  | 9.028501  | .41700  |
| HLA | -4.298012 | 0.461724  | 9.007993  |         |

**ASR<sub>13C</sub>-(21) Structure along the photoisomerization path of ASR<sub>13C</sub> with a C<sub>12</sub>-C<sub>13</sub>-C<sub>14</sub>-C<sub>15</sub> dihedral angle of 21°**

| Atom | x          | y         | z         | charge  |
|------|------------|-----------|-----------|---------|
| N    | -0.148460  | 1.918457  | 13.830959 | -.51630 |
| C    | -1.141273  | 0.868683  | 13.996030 | .03810  |
| C    | -0.829445  | -0.264696 | 13.024035 | .53660  |
| O    | -0.506618  | -1.374576 | 13.452660 | -.58190 |
| H    | -0.441152  | 2.826564  | 13.494348 | .29360  |
| H    | -1.084336  | 0.477914  | 15.003524 | .08800  |
| C    | -2.531083  | 1.469594  | 13.808052 | -.03030 |
| C    | -3.686501  | 0.474778  | 13.858206 | .79940  |
| O    | -3.520987  | -0.755942 | 13.744513 | -.80140 |
| O    | -4.830315  | 0.965505  | 13.840200 | -.80140 |
| H    | -2.582850  | 1.971263  | 12.848148 | -.01220 |
| H    | -2.676768  | 2.229116  | 14.572980 | -.01220 |
| N    | -10.064218 | -5.661172 | 11.035740 | -.39805 |
| C    | -9.548768  | -6.042577 | 12.353772 | -.24000 |
| C    | -10.604227 | -6.832861 | 13.125663 | .68395  |
| O    | -10.477992 | -8.050757 | 13.253906 | -.63955 |
| H    | -10.505711 | -4.753602 | 10.939592 | .22455  |
| H    | -8.714974  | -6.736936 | 12.229175 | .14260  |
| C    | -9.028379  | -4.807144 | 13.104314 | -.00940 |
| C    | -7.759252  | -4.278904 | 12.415771 | .01870  |
| C    | -7.193209  | -3.054662 | 13.129808 | .00000  |
| C    | -5.862068  | -2.617049 | 12.497669 |         |
| N    | -6.049093  | -1.747168 | 11.346985 |         |
| H    | -8.790613  | -5.090277 | 14.129914 | .03620  |
| H    | -9.792600  | -4.029858 | 13.133184 | .03620  |
| H    | -7.973394  | -4.023127 | 11.376802 | .01030  |
| H    | -7.002852  | -5.059816 | 12.441384 | .01030  |
| H    | -7.014575  | -3.318128 | 14.175195 | .06210  |
| H    | -7.921287  | -2.249048 | 13.092761 | .06210  |
| H    | -5.292489  | -3.486204 | 12.210412 |         |
| H    | -5.277258  | -2.067475 | 13.222764 |         |
| H    | -6.119573  | -0.765841 | 11.545029 |         |
| C    | -0.869799  | 1.525923  | 1.819657  |         |
| C    | -0.386044  | 2.412857  | 0.649599  |         |
| C    | 0.836401   | 1.856269  | -0.063056 |         |
| C    | 0.487804   | 0.515197  | -0.690956 |         |
| C    | -0.361980  | -0.377766 | 0.183533  |         |
| C    | -0.957751  | 0.047078  | 1.365353  |         |
| C    | -1.622655  | -0.963687 | 2.130941  |         |
| C    | -2.140198  | -0.948464 | 3.442579  |         |
| C    | -2.800497  | -2.033008 | 4.006167  |         |
| C    | -3.317740  | -1.885478 | 5.365609  |         |
| C    | -4.071902  | -2.793419 | 6.028153  |         |
| C    | -4.574387  | -2.582680 | 7.394939  |         |

|     |           |           |           |         |
|-----|-----------|-----------|-----------|---------|
| C   | -5.227485 | -3.529571 | 8.122052  |         |
| C   | -5.646952 | -3.292033 | 9.511546  |         |
| C   | -5.820269 | -2.040815 | 10.065026 |         |
| C   | 0.105884  | 1.669711  | 3.006627  |         |
| C   | -2.253753 | 2.080673  | 2.217861  |         |
| C   | -0.491832 | -1.790551 | -0.362862 |         |
| C   | -3.033944 | -3.309935 | 3.232843  |         |
| C   | -5.485380 | -4.916455 | 7.565580  |         |
| H   | -0.194622 | 3.412888  | 1.024784  |         |
| H   | -1.193540 | 2.513844  | -0.073526 |         |
| H   | 1.168395  | 2.542914  | -0.832976 |         |
| H   | 1.665648  | 1.738826  | 0.627892  |         |
| H   | 1.390660  | -0.033174 | -0.951585 |         |
| H   | -0.041326 | 0.670340  | -1.632820 |         |
| H   | 0.198269  | 2.716845  | 3.281943  |         |
| H   | -0.231481 | 1.131939  | 3.885762  |         |
| H   | 1.095920  | 1.301137  | 2.764830  |         |
| H   | -2.175384 | 3.154010  | 2.358615  |         |
| H   | -2.988592 | 1.917907  | 1.435813  |         |
| H   | -2.642959 | 1.665984  | 3.138425  |         |
| H   | -0.043512 | -1.843943 | -1.347018 |         |
| H   | 0.025787  | -2.515160 | 0.258330  |         |
| H   | -1.522485 | -2.116756 | -0.460551 |         |
| H   | -1.718633 | -1.911270 | 1.642215  |         |
| H   | -2.049538 | -0.070502 | 4.048284  |         |
| H   | -3.080877 | -0.960164 | 5.859553  |         |
| H   | -4.320603 | -3.721765 | 5.561317  |         |
| H   | -4.343939 | -1.628862 | 7.835069  |         |
| H   | -5.795638 | -4.160357 | 10.127867 |         |
| H   | -5.794449 | -1.178563 | 9.427303  |         |
| H   | -5.977370 | -5.543089 | 8.299130  |         |
| H   | -6.119076 | -4.886068 | 6.685088  |         |
| H   | -4.563903 | -5.414177 | 7.280965  |         |
| H   | -3.441972 | -4.094802 | 3.848756  |         |
| H   | -3.724662 | -3.140969 | 2.412294  |         |
| H   | -2.102300 | -3.685660 | 2.828838  |         |
| O   | -5.998753 | 1.089884  | 11.394614 | -.83400 |
| H   | -6.575181 | 1.861947  | 11.498409 | .41700  |
| H   | -5.500006 | 1.128745  | 12.248217 | .41700  |
| HLA | -6.728002 | -2.901726 | 12.908907 |         |

**ASR<sub>13C</sub>-(30) Structure along the photoisomerization path of ASR<sub>13C</sub> with a C<sub>12</sub>-C<sub>13</sub>-C<sub>14</sub>-C<sub>15</sub> dihedral angle of 30°**

| Atom | x          | y         | z         | charge  |
|------|------------|-----------|-----------|---------|
| N    | -0.148460  | 1.918457  | 13.830959 | -.51630 |
| C    | -1.141273  | 0.868683  | 13.996030 | .03810  |
| C    | -0.829445  | -0.264696 | 13.024035 | .53660  |
| O    | -0.506618  | -1.374576 | 13.452660 | -.58190 |
| H    | -0.441152  | 2.826564  | 13.494348 | .29360  |
| H    | -1.084336  | 0.477914  | 15.003524 | .08800  |
| C    | -2.531083  | 1.469594  | 13.808052 | -.03030 |
| C    | -3.686501  | 0.474778  | 13.858206 | .79940  |
| O    | -3.520987  | -0.755942 | 13.744513 | -.80140 |
| O    | -4.830315  | 0.965505  | 13.840200 | -.80140 |
| H    | -2.582850  | 1.971263  | 12.848148 | -.01220 |
| H    | -2.676768  | 2.229116  | 14.572980 | -.01220 |
| N    | -10.064218 | -5.661172 | 11.035740 | -.39805 |
| C    | -9.548768  | -6.042577 | 12.353772 | -.24000 |
| C    | -10.604227 | -6.832861 | 13.125663 | .68395  |
| O    | -10.477992 | -8.050757 | 13.253906 | -.63955 |
| H    | -10.512295 | -4.756722 | 10.940988 | .22455  |
| H    | -8.715295  | -6.737126 | 12.228312 | .14260  |
| C    | -9.024091  | -4.808977 | 13.110116 | -.00940 |
| C    | -7.754473  | -4.267600 | 12.429664 | .01870  |
| C    | -7.162485  | -3.070600 | 13.174578 | .00000  |
| C    | -5.872331  | -2.561818 | 12.507902 |         |
| N    | -6.140896  | -1.752070 | 11.327895 |         |
| H    | -8.786592  | -5.097372 | 14.134393 | .03620  |
| H    | -9.788911  | -4.032579 | 13.144751 | .03620  |
| H    | -7.980988  | -3.974769 | 11.404059 | .01030  |
| H    | -7.005962  | -5.056273 | 12.416562 | .01030  |
| H    | -6.925169  | -3.383607 | 14.193359 | .06210  |
| H    | -7.901763  | -2.275490 | 13.226875 | .06210  |
| H    | -5.241448  | -3.396216 | 12.246359 |         |
| H    | -5.321321  | -1.941945 | 13.204130 |         |
| H    | -6.293471  | -0.772797 | 11.495194 |         |
| C    | -0.854533  | 1.524152  | 1.812996  |         |
| C    | -0.370549  | 2.424198  | 0.652535  |         |
| C    | 0.854523   | 1.879511  | -0.063966 |         |
| C    | 0.502546   | 0.545467  | -0.704019 |         |
| C    | -0.338238  | -0.362240 | 0.165927  |         |
| C    | -0.932991  | 0.047112  | 1.352538  |         |
| C    | -1.597674  | -0.971963 | 2.115012  |         |
| C    | -2.106803  | -0.970098 | 3.430412  |         |
| C    | -2.779666  | -2.049885 | 3.995070  |         |
| C    | -3.286034  | -1.897299 | 5.360017  |         |
| C    | -4.069793  | -2.784309 | 6.019343  |         |
| C    | -4.528859  | -2.590259 | 7.405775  |         |

|     |           |           |           |         |
|-----|-----------|-----------|-----------|---------|
| C   | -5.208558 | -3.524534 | 8.119871  |         |
| C   | -5.607318 | -3.299886 | 9.522336  |         |
| C   | -5.893371 | -2.060119 | 10.052592 |         |
| C   | 0.115205  | 1.668006  | 3.003828  |         |
| C   | -2.245619 | 2.065243  | 2.204519  |         |
| C   | -0.458514 | -1.769140 | -0.397310 |         |
| C   | -3.023184 | -3.331129 | 3.227351  |         |
| C   | -5.572128 | -4.876009 | 7.539862  |         |
| H   | -0.185229 | 3.420936  | 1.038951  |         |
| H   | -1.175584 | 2.528745  | -0.072402 |         |
| H   | 1.185495  | 2.573765  | -0.828317 |         |
| H   | 1.683556  | 1.756279  | 0.626230  |         |
| H   | 1.402028  | 0.004477  | -0.989645 |         |
| H   | -0.039027 | 0.714871  | -1.635432 |         |
| H   | 0.199364  | 2.714277  | 3.285280  |         |
| H   | -0.222254 | 1.121730  | 3.877372  |         |
| H   | 1.107655  | 1.305960  | 2.761065  |         |
| H   | -2.179514 | 3.139637  | 2.344555  |         |
| H   | -2.973050 | 1.892586  | 1.417293  |         |
| H   | -2.634479 | 1.644054  | 3.122592  |         |
| H   | -0.039172 | -1.799956 | -1.395438 |         |
| H   | 0.091166  | -2.492547 | 0.197762  |         |
| H   | -1.485457 | -2.111782 | -0.471139 |         |
| H   | -1.708816 | -1.906590 | 1.605073  |         |
| H   | -1.992715 | -0.102536 | 4.048333  |         |
| H   | -3.018512 | -0.984255 | 5.864062  |         |
| H   | -4.378772 | -3.687303 | 5.536685  |         |
| H   | -4.234052 | -1.672045 | 7.882391  |         |
| H   | -5.644819 | -4.167855 | 10.156696 |         |
| H   | -5.967153 | -1.223366 | 9.385618  |         |
| H   | -6.080219 | -5.485035 | 8.277915  |         |
| H   | -6.224997 | -4.777099 | 6.678689  |         |
| H   | -4.699287 | -5.428899 | 7.212743  |         |
| H   | -3.356511 | -4.132576 | 3.868533  |         |
| H   | -3.770209 | -3.187302 | 2.451592  |         |
| H   | -2.112936 | -3.674952 | 2.752389  |         |
| O   | -6.051362 | 1.070508  | 11.401588 | -.83400 |
| H   | -6.583460 | 1.875727  | 11.492016 | .41700  |
| H   | -5.544511 | 1.091762  | 12.250720 | .41700  |
| HLA | -6.710756 | -2.892457 | 12.941170 |         |

**ASR<sub>13C</sub>-(40) Structure along the photoisomerization path of ASR<sub>13C</sub> with a C<sub>12</sub>-C<sub>13</sub>-C<sub>14</sub>-C<sub>15</sub> dihedral angle of 40°**

| Atom | x          | y         | z         | charge  |
|------|------------|-----------|-----------|---------|
| N    | -0.148460  | 1.918457  | 13.830959 | -.51630 |
| C    | -1.141273  | 0.868683  | 13.996030 | .03810  |
| C    | -0.829445  | -0.264696 | 13.024035 | .53660  |
| O    | -0.506618  | -1.374576 | 13.452660 | -.58190 |
| H    | -0.441152  | 2.826564  | 13.494348 | .29360  |
| H    | -1.084336  | 0.477914  | 15.003524 | .08800  |
| C    | -2.531083  | 1.469594  | 13.808052 | -.03030 |
| C    | -3.686501  | 0.474778  | 13.858206 | .79940  |
| O    | -3.520987  | -0.755942 | 13.744513 | -.80140 |
| O    | -4.830315  | 0.965505  | 13.840200 | -.80140 |
| H    | -2.582850  | 1.971263  | 12.848148 | -.01220 |
| H    | -2.676768  | 2.229116  | 14.572980 | -.01220 |
| N    | -10.064218 | -5.661172 | 11.035740 | -.39805 |
| C    | -9.548768  | -6.042577 | 12.353772 | -.24000 |
| C    | -10.604227 | -6.832861 | 13.125663 | .68395  |
| O    | -10.477992 | -8.050757 | 13.253906 | -.63955 |
| H    | -10.515473 | -4.758285 | 10.941540 | .22455  |
| H    | -8.715370  | -6.737321 | 12.228687 | .14260  |
| C    | -9.026205  | -4.808075 | 13.110501 | -.00940 |
| C    | -7.751782  | -4.271567 | 12.435966 | .01870  |
| C    | -7.166115  | -3.067264 | 13.175828 | .00000  |
| C    | -5.875032  | -2.563595 | 12.507773 |         |
| N    | -6.158507  | -1.769835 | 11.324585 |         |
| H    | -8.795055  | -5.094564 | 14.136619 | .03620  |
| H    | -9.789268  | -4.029488 | 13.139507 | .03620  |
| H    | -7.971797  | -3.989486 | 11.405401 | .01030  |
| H    | -7.002871  | -5.059703 | 12.434536 | .01030  |
| H    | -6.938289  | -3.364684 | 14.201270 | .06210  |
| H    | -7.908329  | -2.273590 | 13.205660 | .06210  |
| H    | -5.246483  | -3.400104 | 12.248635 |         |
| H    | -5.320940  | -1.937211 | 13.195366 |         |
| H    | -6.370708  | -0.798638 | 11.478562 |         |
| C    | -0.856041  | 1.526597  | 1.813473  |         |
| C    | -0.372679  | 2.421777  | 0.649778  |         |
| C    | 0.850586   | 1.873554  | -0.066787 |         |
| C    | 0.498875   | 0.537142  | -0.701637 |         |
| C    | -0.342548  | -0.364547 | 0.172006  |         |
| C    | -0.936719  | 0.050363  | 1.353252  |         |
| C    | -1.609222  | -0.967525 | 2.115952  |         |
| C    | -2.114269  | -0.968224 | 3.426674  |         |
| C    | -2.787661  | -2.052922 | 3.989062  |         |
| C    | -3.284017  | -1.901865 | 5.350748  |         |
| C    | -4.049299  | -2.795740 | 6.024525  |         |
| C    | -4.475476  | -2.605326 | 7.418707  |         |

|     |           |           |           |         |
|-----|-----------|-----------|-----------|---------|
| C   | -5.158470 | -3.529014 | 8.136121  |         |
| C   | -5.501849 | -3.306354 | 9.558826  |         |
| C   | -5.919252 | -2.090602 | 10.053447 |         |
| C   | 0.113758  | 1.671672  | 3.005115  |         |
| C   | -2.246122 | 2.072442  | 2.203750  |         |
| C   | -0.468885 | -1.773579 | -0.385370 |         |
| C   | -3.022542 | -3.331716 | 3.215821  |         |
| C   | -5.598057 | -4.856843 | 7.557401  |         |
| H   | -0.187645 | 3.421026  | 1.029851  |         |
| H   | -1.178852 | 2.520662  | -0.074444 |         |
| H   | 1.177993  | 2.564738  | -0.835059 |         |
| H   | 1.680600  | 1.752580  | 0.622545  |         |
| H   | 1.398759  | -0.004949 | -0.983616 |         |
| H   | -0.042608 | 0.702730  | -1.633421 |         |
| H   | 0.201719  | 2.718396  | 3.283756  |         |
| H   | -0.225450 | 1.129271  | 3.880615  |         |
| H   | 1.105648  | 1.306024  | 2.765579  |         |
| H   | -2.176663 | 3.147238  | 2.338514  |         |
| H   | -2.974491 | 1.899699  | 1.417429  |         |
| H   | -2.636927 | 1.655917  | 3.123308  |         |
| H   | -0.040670 | -1.814061 | -1.379127 |         |
| H   | 0.067444  | -2.499760 | 0.218166  |         |
| H   | -1.498353 | -2.106768 | -0.467551 |         |
| H   | -1.722814 | -1.899840 | 1.604244  |         |
| H   | -2.001163 | -0.104117 | 4.049271  |         |
| H   | -3.017142 | -0.985576 | 5.849231  |         |
| H   | -4.355238 | -3.703072 | 5.548656  |         |
| H   | -4.141399 | -1.703503 | 7.901099  |         |
| H   | -5.377813 | -4.142828 | 10.224038 |         |
| H   | -6.113892 | -1.293228 | 9.365458  |         |
| H   | -6.156441 | -5.425700 | 8.290831  |         |
| H   | -6.237126 | -4.717192 | 6.693146  |         |
| H   | -4.756482 | -5.462974 | 7.240755  |         |
| H   | -3.385342 | -4.127313 | 3.847597  |         |
| H   | -3.742134 | -3.183025 | 2.415508  |         |
| H   | -2.098680 | -3.683292 | 2.772636  |         |
| O   | -6.057612 | 1.052176  | 11.398846 | -.83400 |
| H   | -6.559332 | 1.876991  | 11.483058 | .41700  |
| H   | -5.545222 | 1.066526  | 12.244696 | .41700  |
| HLA | -6.714227 | -2.890976 | 12.942023 |         |



**ASR<sub>13C</sub>-(50) Structure along the photoisomerization path of ASR<sub>13C</sub> with a C<sub>12</sub>-C<sub>13</sub>-C<sub>14</sub>-C<sub>15</sub> dihedral angle of 50°**

| Atom | x          | y         | z         | charge  |
|------|------------|-----------|-----------|---------|
| N    | -0.148460  | 1.918457  | 13.830959 | -.51630 |
| C    | -1.141273  | 0.868683  | 13.996030 | .03810  |
| C    | -0.829445  | -0.264696 | 13.024035 | .53660  |
| O    | -0.506618  | -1.374576 | 13.452660 | -.58190 |
| H    | -0.441152  | 2.826564  | 13.494348 | .29360  |
| H    | -1.084336  | 0.477914  | 15.003524 | .08800  |
| C    | -2.531083  | 1.469594  | 13.808052 | -.03030 |
| C    | -3.686501  | 0.474778  | 13.858206 | .79940  |
| O    | -3.520987  | -0.755942 | 13.744513 | -.80140 |
| O    | -4.830315  | 0.965505  | 13.840200 | -.80140 |
| H    | -2.582850  | 1.971263  | 12.848148 | -.01220 |
| H    | -2.676768  | 2.229116  | 14.572980 | -.01220 |
| N    | -10.064218 | -5.661172 | 11.035740 | -.39805 |
| C    | -9.548768  | -6.042577 | 12.353772 | -.24000 |
| C    | -10.604227 | -6.832861 | 13.125663 | .68395  |
| O    | -10.477992 | -8.050757 | 13.253906 | -.63955 |
| H    | -10.514499 | -4.757820 | 10.941346 | .22455  |
| H    | -8.715339  | -6.737293 | 12.228688 | .14260  |
| C    | -9.026626  | -4.809989 | 13.112622 | -.00940 |
| C    | -7.752408  | -4.272935 | 12.439697 | .01870  |
| C    | -7.167717  | -3.072367 | 13.185842 | .00000  |
| C    | -5.885071  | -2.558406 | 12.510866 |         |
| N    | -6.183234  | -1.771614 | 11.324971 |         |
| H    | -8.794604  | -5.098095 | 14.138065 | .03620  |
| H    | -9.790177  | -4.031934 | 13.142487 | .03620  |
| H    | -7.972863  | -3.986485 | 11.410728 | .01030  |
| H    | -7.003287  | -5.061133 | 12.434074 | .01030  |
| H    | -6.928260  | -3.379249 | 14.205575 | .06210  |
| H    | -7.912756  | -2.281922 | 13.231905 | .06210  |
| H    | -5.250433  | -3.390989 | 12.253967 |         |
| H    | -5.333956  | -1.925858 | 13.195922 |         |
| H    | -6.397474  | -0.799293 | 11.479223 |         |
| C    | -0.855243  | 1.525583  | 1.810191  |         |
| C    | -0.371805  | 2.423645  | 0.648773  |         |
| C    | 0.852857   | 1.876349  | -0.066656 |         |
| C    | 0.501050   | 0.541380  | -0.705357 |         |
| C    | -0.340226  | -0.362067 | 0.167875  |         |
| C    | -0.934596  | 0.050557  | 1.347823  |         |
| C    | -1.609779  | -0.968043 | 2.112666  |         |
| C    | -2.110517  | -0.966594 | 3.422000  |         |
| C    | -2.782337  | -2.053048 | 3.989499  |         |
| C    | -3.271773  | -1.906949 | 5.349444  |         |
| C    | -4.034536  | -2.805430 | 6.021757  |         |
| C    | -4.451598  | -2.617014 | 7.415150  |         |

|     |           |           |           |         |
|-----|-----------|-----------|-----------|---------|
| C   | -5.190843 | -3.506792 | 8.118129  |         |
| C   | -5.466844 | -3.290015 | 9.560603  |         |
| C   | -5.952197 | -2.097662 | 10.052597 |         |
| C   | 0.113887  | 1.670044  | 3.002221  |         |
| C   | -2.245374 | 2.068567  | 2.203424  |         |
| C   | -0.465589 | -1.771760 | -0.388124 |         |
| C   | -3.022581 | -3.330214 | 3.216416  |         |
| C   | -5.629916 | -4.839298 | 7.548059  |         |
| H   | -0.186635 | 3.421570  | 1.032150  |         |
| H   | -1.177426 | 2.524546  | -0.075986 |         |
| H   | 1.184441  | 2.569677  | -0.831316 |         |
| H   | 1.680472  | 1.752469  | 0.625197  |         |
| H   | 1.401476  | 0.000503  | -0.987942 |         |
| H   | -0.039571 | 0.709296  | -1.637289 |         |
| H   | 0.199734  | 2.716779  | 3.281620  |         |
| H   | -0.226045 | 1.126072  | 3.876378  |         |
| H   | 1.105849  | 1.304869  | 2.762279  |         |
| H   | -2.177308 | 3.142930  | 2.342045  |         |
| H   | -2.974714 | 1.895393  | 1.418078  |         |
| H   | -2.632774 | 1.648264  | 3.122548  |         |
| H   | -0.040107 | -1.813607 | -1.383112 |         |
| H   | 0.072328  | -2.495904 | 0.216500  |         |
| H   | -1.495010 | -2.105988 | -0.466264 |         |
| H   | -1.725539 | -1.900039 | 1.601033  |         |
| H   | -1.997817 | -0.101221 | 4.043129  |         |
| H   | -3.004697 | -0.994055 | 5.854339  |         |
| H   | -4.344792 | -3.709665 | 5.542710  |         |
| H   | -4.100580 | -1.724090 | 7.901942  |         |
| H   | -5.296653 | -4.125702 | 10.217974 |         |
| H   | -6.164434 | -1.309142 | 9.356635  |         |
| H   | -6.181449 | -5.410751 | 8.285100  |         |
| H   | -6.266631 | -4.716611 | 6.679165  |         |
| H   | -4.778757 | -5.438599 | 7.240265  |         |
| H   | -3.381468 | -4.126894 | 3.848796  |         |
| H   | -3.747282 | -3.179107 | 2.421561  |         |
| H   | -2.102539 | -3.681967 | 2.766275  |         |
| O   | -6.066477 | 1.054483  | 11.404001 | -.83400 |
| H   | -6.567151 | 1.880407  | 11.488761 | .41700  |
| H   | -5.544731 | 1.074081  | 12.244062 | .41700  |
| HLA | -6.719125 | -2.892614 | 12.949795 |         |

**ASR<sub>13C</sub>-(60) Structure along the photoisomerization path of ASR<sub>13C</sub> with a C<sub>12</sub>-C<sub>13</sub>-C<sub>14</sub>-C<sub>15</sub> dihedral angle of 60°**

| Atom | x          | y         | z         | charge  |
|------|------------|-----------|-----------|---------|
| N    | -0.148460  | 1.918457  | 13.830959 | -.51630 |
| C    | -1.141273  | 0.868683  | 13.996030 | .03810  |
| C    | -0.829445  | -0.264696 | 13.024035 | .53660  |
| O    | -0.506618  | -1.374576 | 13.452660 | -.58190 |
| H    | -0.441152  | 2.826564  | 13.494348 | .29360  |
| H    | -1.084336  | 0.477914  | 15.003524 | .08800  |
| C    | -2.531083  | 1.469594  | 13.808052 | -.03030 |
| C    | -3.686501  | 0.474778  | 13.858206 | .79940  |
| O    | -3.520987  | -0.755942 | 13.744513 | -.80140 |
| O    | -4.830315  | 0.965505  | 13.840200 | -.80140 |
| H    | -2.582850  | 1.971263  | 12.848148 | -.01220 |
| H    | -2.676768  | 2.229116  | 14.572980 | -.01220 |
| N    | -10.064218 | -5.661172 | 11.035740 | -.39805 |
| C    | -9.548768  | -6.042577 | 12.353772 | -.24000 |
| C    | -10.604227 | -6.832861 | 13.125663 | .68395  |
| O    | -10.477992 | -8.050757 | 13.253906 | -.63955 |
| H    | -10.519826 | -4.760491 | 10.941987 | .22455  |
| H    | -8.715507  | -6.737527 | 12.228561 | .14260  |
| C    | -9.028403  | -4.812868 | 13.121758 | -.00940 |
| C    | -7.755992  | -4.264466 | 12.454572 | .01870  |
| C    | -7.145248  | -3.087603 | 13.222847 | .00000  |
| C    | -5.894322  | -2.528585 | 12.518814 |         |
| N    | -6.254304  | -1.789160 | 11.316368 |         |
| H    | -8.795598  | -5.109176 | 14.144708 | .03620  |
| H    | -9.794425  | -4.037335 | 13.159131 | .03620  |
| H    | -7.990364  | -3.951036 | 11.437064 | .01030  |
| H    | -7.014132  | -5.058169 | 12.415876 | .01030  |
| H    | -6.863934  | -3.430786 | 14.220397 | .06210  |
| H    | -7.891877  | -2.304521 | 13.333337 | .06210  |
| H    | -5.222786  | -3.335501 | 12.275981 |         |
| H    | -5.365495  | -1.853404 | 13.181941 |         |
| H    | -6.551033  | -0.832893 | 11.461970 |         |
| C    | -0.839563  | 1.514684  | 1.816710  |         |
| C    | -0.354173  | 2.443730  | 0.680606  |         |
| C    | 0.875917   | 1.918493  | -0.041149 |         |
| C    | 0.524510   | 0.600228  | -0.711620 |         |
| C    | -0.309679  | -0.329431 | 0.142956  |         |
| C    | -0.910936  | 0.050249  | 1.322773  |         |
| C    | -1.599274  | -0.988697 | 2.075516  |         |
| C    | -2.074729  | -1.009193 | 3.383577  |         |
| C    | -2.760102  | -2.098590 | 3.964256  |         |
| C    | -3.219899  | -1.953087 | 5.321593  |         |
| C    | -3.998690  | -2.838188 | 6.011572  |         |
| C    | -4.395144  | -2.635608 | 7.401562  |         |

|     |           |           |           |         |
|-----|-----------|-----------|-----------|---------|
| C   | -5.161044 | -3.496032 | 8.115217  |         |
| C   | -5.422048 | -3.267695 | 9.567114  |         |
| C   | -6.050970 | -2.130965 | 10.044753 |         |
| C   | 0.125626  | 1.637090  | 3.014030  |         |
| C   | -2.233948 | 2.041424  | 2.215518  |         |
| C   | -0.410433 | -1.726510 | -0.448275 |         |
| C   | -3.033431 | -3.359467 | 3.177907  |         |
| C   | -5.779694 | -4.743127 | 7.516232  |         |
| H   | -0.176783 | 3.432582  | 1.089776  |         |
| H   | -1.155278 | 2.557803  | -0.046944 |         |
| H   | 1.210565  | 2.630363  | -0.787302 |         |
| H   | 1.700708  | 1.778042  | 0.650822  |         |
| H   | 1.424416  | 0.070924  | -1.015066 |         |
| H   | -0.021571 | 0.793420  | -1.634752 |         |
| H   | 0.205460  | 2.677061  | 3.318783  |         |
| H   | -0.211499 | 1.069388  | 3.873468  |         |
| H   | 1.118860  | 1.282233  | 2.764946  |         |
| H   | -2.176002 | 3.113274  | 2.375178  |         |
| H   | -2.957874 | 1.875473  | 1.423781  |         |
| H   | -2.621053 | 1.598831  | 3.124005  |         |
| H   | 0.003530  | -1.728649 | -1.449254 |         |
| H   | 0.152980  | -2.453270 | 0.129242  |         |
| H   | -1.431823 | -2.083957 | -0.524806 |         |
| H   | -1.736119 | -1.901449 | 1.536102  |         |
| H   | -1.942472 | -0.155164 | 4.015348  |         |
| H   | -2.924727 | -1.051368 | 5.830413  |         |
| H   | -4.336978 | -3.730275 | 5.529851  |         |
| H   | -3.987539 | -1.768923 | 7.892019  |         |
| H   | -4.996219 | -3.982231 | 10.256248 |         |
| H   | -6.432383 | -1.422860 | 9.331274  |         |
| H   | -6.368063 | -5.272862 | 8.255951  |         |
| H   | -6.428935 | -4.502292 | 6.680683  |         |
| H   | -5.025571 | -5.431122 | 7.146499  |         |
| H   | -3.345233 | -4.174334 | 3.812537  |         |
| H   | -3.803260 | -3.196668 | 2.429147  |         |
| H   | -2.140705 | -3.689576 | 2.661542  |         |
| O   | -6.124959 | 1.035661  | 11.432432 | -.83400 |
| H   | -6.587768 | 1.886215  | 11.492003 | .41700  |
| H   | -5.586411 | 1.067056  | 12.261599 | .41700  |
| HLA | -6.706369 | -2.891472 | 12.975861 |         |

**ASR<sub>13C</sub>-(70) Structure along the photoisomerization path of ASR<sub>13C</sub> with a C<sub>12</sub>-C<sub>13</sub>-C<sub>14</sub>-C<sub>15</sub> dihedral angle of 70°**

| Atom | x          | y         | z         | charge  |
|------|------------|-----------|-----------|---------|
| N    | -0.148460  | 1.918457  | 13.830959 | -.51630 |
| C    | -1.141273  | 0.868683  | 13.996030 | .03810  |
| C    | -0.829445  | -0.264696 | 13.024035 | .53660  |
| O    | -0.506618  | -1.374576 | 13.452660 | -.58190 |
| H    | -0.441152  | 2.826564  | 13.494348 | .29360  |
| H    | -1.084336  | 0.477914  | 15.003524 | .08800  |
| C    | -2.531083  | 1.469594  | 13.808052 | -.03030 |
| C    | -3.686501  | 0.474778  | 13.858206 | .79940  |
| O    | -3.520987  | -0.755942 | 13.744513 | -.80140 |
| O    | -4.830315  | 0.965505  | 13.840200 | -.80140 |
| H    | -2.582850  | 1.971263  | 12.848148 | -.01220 |
| H    | -2.676768  | 2.229116  | 14.572980 | -.01220 |
| N    | -10.064218 | -5.661172 | 11.035740 | -.39805 |
| C    | -9.548768  | -6.042577 | 12.353772 | -.24000 |
| C    | -10.604227 | -6.832861 | 13.125663 | .68395  |
| O    | -10.477992 | -8.050757 | 13.253906 | -.63955 |
| H    | -10.519292 | -4.760239 | 10.941867 | .22455  |
| H    | -8.715949  | -6.738076 | 12.228516 | .14260  |
| C    | -9.027979  | -4.813291 | 13.121073 | -.00940 |
| C    | -7.755281  | -4.268451 | 12.453053 | .01870  |
| C    | -7.147837  | -3.089052 | 13.219124 | .00000  |
| C    | -5.898058  | -2.537041 | 12.509322 |         |
| N    | -6.265708  | -1.793205 | 11.313173 |         |
| H    | -8.795748  | -5.108705 | 14.144406 | .03620  |
| H    | -9.792654  | -4.036400 | 13.156508 | .03620  |
| H    | -7.988327  | -3.959614 | 11.433566 | .01030  |
| H    | -7.012872  | -5.061857 | 12.418920 | .01030  |
| H    | -6.864964  | -3.428626 | 14.217240 | .06210  |
| H    | -7.896796  | -2.307129 | 13.326055 | .06210  |
| H    | -5.236544  | -3.349781 | 12.256347 |         |
| H    | -5.359232  | -1.867616 | 13.170474 |         |
| H    | -6.569550  | -0.838271 | 11.462227 |         |
| C    | -0.843976  | 1.514730  | 1.823157  |         |
| C    | -0.359317  | 2.441168  | 0.685215  |         |
| C    | 0.870219   | 1.911905  | -0.035362 |         |
| C    | 0.519453   | 0.593200  | -0.706822 |         |
| C    | -0.315569  | -0.332956 | 0.149850  |         |
| C    | -0.913805  | 0.051015  | 1.327509  |         |
| C    | -1.603445  | -0.987080 | 2.081875  |         |
| C    | -2.075247  | -1.005302 | 3.385220  |         |
| C    | -2.761048  | -2.100042 | 3.962094  |         |
| C    | -3.216926  | -1.957853 | 5.311183  |         |
| C    | -3.994835  | -2.847638 | 5.999522  |         |
| C    | -4.367549  | -2.645697 | 7.387333  |         |

|     |           |           |           |         |
|-----|-----------|-----------|-----------|---------|
| C   | -5.189475 | -3.458780 | 8.094070  |         |
| C   | -5.381270 | -3.230718 | 9.553076  |         |
| C   | -6.074850 | -2.133598 | 10.042393 |         |
| C   | 0.122490  | 1.638070  | 3.020390  |         |
| C   | -2.238909 | 2.041831  | 2.223333  |         |
| C   | -0.422103 | -1.734005 | -0.432245 |         |
| C   | -3.030245 | -3.359925 | 3.174780  |         |
| C   | -5.791701 | -4.723996 | 7.519042  |         |
| H   | -0.180629 | 3.431636  | 1.090313  |         |
| H   | -1.161405 | 2.552737  | -0.041621 |         |
| H   | 1.208004  | 2.623871  | -0.779837 |         |
| H   | 1.692608  | 1.768836  | 0.659073  |         |
| H   | 1.420687  | 0.063712  | -1.006484 |         |
| H   | -0.024621 | 0.784843  | -1.631459 |         |
| H   | 0.203220  | 2.678181  | 3.324763  |         |
| H   | -0.213006 | 1.070845  | 3.880940  |         |
| H   | 1.115558  | 1.283022  | 2.770876  |         |
| H   | -2.180905 | 3.113879  | 2.382899  |         |
| H   | -2.963965 | 1.876046  | 1.432399  |         |
| H   | -2.625906 | 1.599179  | 3.132054  |         |
| H   | -0.013856 | -1.746150 | -1.435302 |         |
| H   | 0.141692  | -2.458260 | 0.148181  |         |
| H   | -1.444716 | -2.089864 | -0.500198 |         |
| H   | -1.743385 | -1.900267 | 1.545210  |         |
| H   | -1.944882 | -0.153424 | 4.020522  |         |
| H   | -2.925574 | -1.055756 | 5.821190  |         |
| H   | -4.342485 | -3.735246 | 5.516811  |         |
| H   | -3.934380 | -1.790389 | 7.875739  |         |
| H   | -4.921306 | -3.941366 | 10.223679 |         |
| H   | -6.466573 | -1.425109 | 9.334587  |         |
| H   | -6.367297 | -5.258003 | 8.265848  |         |
| H   | -6.437642 | -4.527007 | 6.670210  |         |
| H   | -5.010373 | -5.395509 | 7.175356  |         |
| H   | -3.347996 | -4.173297 | 3.808253  |         |
| H   | -3.793506 | -3.197634 | 2.419369  |         |
| H   | -2.132014 | -3.690283 | 2.668810  |         |
| O   | -6.121122 | 1.029523  | 11.427392 | -.83400 |
| H   | -6.585234 | 1.878949  | 11.492214 | .41700  |
| H   | -5.576826 | 1.061610  | 12.252582 | .41700  |
| HLA | -6.709788 | -2.895569 | 12.970356 |         |
